# Supplementary material for: Ethnic differences in cardiovascular morbidity and mortality among patients with breast cancer in the Netherlands: a register-based cohort study
Source: PubMed Central journal article supplement — BMJ Open. 2018 Aug 17;8(8):e021509. doi: 10.1136/bmjopen-2018-021509 (PMC6104747; doi:10.1136/bmjopen-2018-021509), 2018-08-17
Supplement: bmjopen-2018-021509.draft_revisions.pdf [file bmjopen-2018-021509.draft_revisions.pdf]

# BMJ Open

BMJ Open is committed to open peer review. As part of this commitment we make the peer review history of every article we publish publicly available.

When an article is published we post the peer reviewers' comments and the authors' responses online. We also post the versions of the paper that were used during peer review. These are the versions that the peer review comments apply to.

The versions of the paper that follow are the versions that were submitted during the peer review process. They are not the versions of record or the final published versions. They should not be cited or distributed as the published version of this manuscript.

BMJ Open is an open access journal and the full, final, typeset and author-corrected version of record of the manuscript is available on our site with no access controls, subscription charges or pay-per-view fees (<http://bmjopen.bmj.com>).

If you have any questions on BMJ Open's open peer review process please email [info.bmjopen@bmj.com](mailto:info.bmjopen@bmj.com)

# BMJ Open

## Ethnic differences in cardiovascular morbidity and mortality among breast cancer patients in the Netherlands: a register-based cohort study.

|                               |                                                                                                                                                                                                                                                                                                                                                                                                                                                                                                                                                                                                                                                                                                                                                                                                                                                                                                              |
|-------------------------------|--------------------------------------------------------------------------------------------------------------------------------------------------------------------------------------------------------------------------------------------------------------------------------------------------------------------------------------------------------------------------------------------------------------------------------------------------------------------------------------------------------------------------------------------------------------------------------------------------------------------------------------------------------------------------------------------------------------------------------------------------------------------------------------------------------------------------------------------------------------------------------------------------------------|
| Journal:                      | <i>BMJ Open</i>                                                                                                                                                                                                                                                                                                                                                                                                                                                                                                                                                                                                                                                                                                                                                                                                                                                                                              |
| Manuscript ID                 | bmjopen-2018-021509                                                                                                                                                                                                                                                                                                                                                                                                                                                                                                                                                                                                                                                                                                                                                                                                                                                                                          |
| Article Type:                 | Research                                                                                                                                                                                                                                                                                                                                                                                                                                                                                                                                                                                                                                                                                                                                                                                                                                                                                                     |
| Date Submitted by the Author: | 20-Jan-2018                                                                                                                                                                                                                                                                                                                                                                                                                                                                                                                                                                                                                                                                                                                                                                                                                                                                                                  |
| Complete List of Authors:     | Deen, Laura; University of Amsterdam, Department of Public Health, Academic Medical Centre; Copenhagen University Hospital, Section of Immigrant Medicine, Department of Infectious Diseases<br>Buddeke, Josefiën; University Medical Centre Utrecht, Julius Centre for Health Sciences and Primary Care<br>Vaartjes, Ilonca; University Medical Centre Utrecht, Julius Centre for Health Sciences and Primary Care<br>Bots, Michael; University Medical Centre Utrecht, Julius Centre for Health Sciences and Primary Care<br>Nørredam, Marie; University of Copenhagen, Danish Research Centre for Migration, Ethnicity and Health, Section of Health Services Research, Department of Public Health; Copenhagen University Hospital, Section of Immigrant Medicine, Department of Infectious Diseases<br>Agyemang, Charles; University of Amsterdam, Department of Public Health, Academic Medical Center |
| Keywords:                     | Ethnicity, breast cancer, migrant, cardiovascular disease, cardiovascular mortality                                                                                                                                                                                                                                                                                                                                                                                                                                                                                                                                                                                                                                                                                                                                                                                                                          |
|                               |                                                                                                                                                                                                                                                                                                                                                                                                                                                                                                                                                                                                                                                                                                                                                                                                                                                                                                              |

SCHOLARONE™  
Manuscripts

1  
2  
3 1 **Ethnic differences in cardiovascular morbidity and mortality among breast cancer patients**  
4  
5 2 **in the Netherlands: a register-based cohort study.**  
6  
7  
8  
9

10 4 Laura Deen, MSC<sup>1,2</sup>; Josefiën Buddeke, MSC<sup>3</sup>; Ilonca Vaartjes, PhD<sup>3</sup>; Michiel L. Bots, MD  
11  
12 5 PhD<sup>3</sup>; Marie Norredam, MD PhD<sup>2,4</sup>; Charles Agyemang, MPH, PhD<sup>1</sup>  
13

14 6 <sup>1</sup>*Department of Public Health, Academic Medical Centre, University of Amsterdam, Amsterdam*  
15  
16  
17 7 *Meibergdreef 9, 1105 AZ Amsterdam-Zuidoost, The Netherlands*  
18

19 8 <sup>2</sup>*Section of Immigrant Medicine, Department of Infectious Diseases, Copenhagen University*  
20  
21 9 *Hospital, Kettegård allé 30, 2650 Hvidovre, Denmark*  
22

23  
24 10 <sup>3</sup>*Julius Centre for Health Sciences and Primary Care, University Medical Centre Utrecht,*  
25  
26 11 *Heidelberglaan 100, 3584 CX Utrecht, The Netherlands*  
27

28 12 <sup>4</sup>*Danish Research Centre for Migration, Ethnicity and Health, Section of Health Services*  
29  
30 13 *Research, Department of Public Health, University of Copenhagen, Øster Farimagsgade 5, 1014*  
31  
32 14 *København K, Denmark*  
33  
34

35 15  
36  
37 16 Corresponding author:  
38  
39 17 Laura Deen, *Department of Public Health, Academic Medical Centre, University of Amsterdam,*  
40  
41 18 *Amsterdam Meibergdreef 9, 1105 AZ Amsterdam-Zuidoost, The Netherlands*  
42  
43

44 19 e-mail: [nhq382@alumni.ku.dk](mailto:nhq382@alumni.ku.dk), telephone.: +4527514559  
45  
46

47 20

48  
49 21 **Word count:**

50  
51 22 Abstract: 239.

52  
53 23 Total manuscript (excluding references, tables and figures): 3876  
54  
55

56 24

## 25 **Abstract**

26 **Objectives:** Cardiovascular disease (CVD) is of increasing concern among breast cancer  
27 survivors. However, evidence on ethnic differences in CVD among women with breast cancer is  
28 sparse. We assessed ethnic differences in cardiovascular morbidity and mortality among breast  
29 cancer patients in the Netherlands.

30  
31 **Methods:** A nationwide register-based cohort study comprising all women with a first admission  
32 for breast cancer (n=127,714) between 1996 and 2010 in the Netherlands was conducted.  
33 Differences in CVD admission, CVD mortality and overall CVD event, which comprised a CVD  
34 admission and/or CVD mortality, between the largest ethnic minority groups (Surinamese,  
35 Moroccan, Turkish, Antillean, and Indonesian) and the Dutch general population (henceforth,  
36 Dutch) were investigated using Cox proportional hazard models.

37  
38 **Results:** The incidence of cardiovascular outcomes varied by ethnic group. The incidence of an  
39 overall cardiovascular event was significantly higher for women with breast cancer from  
40 Suriname (HR=1.46;95% CI 1.29–1.64) and Turkey (HR=1.25;95% CI 1.03–1.51), compared  
41 with Dutch women with breast cancer. In contrast, Indonesian women with breast cancer had a  
42 significantly lower risk (HR=0.88; 95% CI 0.81–0.96) of a cardiovascular event compared with  
43 Dutch women with breast cancer. There were no significant differences between Moroccan and  
44 Antillean women, and Dutch women with breast cancer.

45  
46 **Conclusions:** Our findings suggest that Surinamese and Turkish women with breast cancer are  
47 disadvantaged in terms of cardiovascular outcomes compared with Dutch women with breast  
48 cancer. More work is needed to unravel the potential factors contributing to these differences.

1  
2  
3  
4  
5  
6  
7  
8  
9  
10  
11  
12  
13  
14  
15  
16  
17  
18  
19  
20  
21  
22  
23  
24  
25  
26  
27  
28  
29  
30  
31  
32  
33  
34  
35  
36  
37  
38  
39  
40  
41  
42  
43  
44  
45  
46  
47  
48  
49  
50  
51  
52  
53  
54  
55  
56  
57  
58  
59  
60

**Strengths and limitations of this study:**

- This study provides important new insights into ethnic differences in cardiovascular morbidity and mortality among breast cancer patients in a European country.
- The study builds on data from nation-wide registries with high validity.
- Although the study is based on a nationwide cohort of breast cancer patients, absolute numbers are somewhat small when divided into different ethnic groups.
- Data on CVD risk factors, such as smoking, alcohol and obesity were not available since the study builds on registry data.

### 73 1. Introduction

74 Due to earlier diagnosis and more effective treatment, the survival rate among breast cancer  
75 patients has now improved resulting in a growing population of breast cancer survivors. In The  
76 Netherlands, the 5-year-age-standardized survival rate has increased from 80% in 1995-99 to  
77 85% in 2005-09 [1]. With breast cancer becoming a curable disease, comorbidities and death  
78 from other conditions among breast cancer survivors are of increasing concern.

79  
80 One of the most important comorbidities to consider in women with breast cancer is  
81 cardiovascular disease (CVD), and with the growing number of breast cancer survivors, a better  
82 understanding of the risk of CVD in this group is crucial. Studies show that women surviving  
83 breast cancer have an increased risk of CVD morbidity and CVD-specific mortality compared  
84 with women without breast cancer [2,3]. Moreover, among breast cancer survivors, CVD-related  
85 mortality is becoming more common than breast cancer-specific mortality [4,5]. This is mainly  
86 attributable to cardiotoxic effects of breast cancer therapy [6,7]. Further, survivors are typically  
87 older than the general population and may be more likely to develop CVD because of risk factors  
88 common to both cancer and CVD [8].

89  
90 Evidence suggests ethnic inequalities in the prognosis of breast cancer with a higher risk of breast  
91 cancer-specific and overall mortality among some ethnic minority groups [9,10]. However,  
92 although ethnic variation in cardiovascular outcomes in the general population exists [11,12], the  
93 evidence among breast cancer patients is limited. Data from the US show that African American  
94 and Pacific Islander women with breast cancer had an increased risk of dying from CVD  
95 compared with White American breast cancer patients [4,13]. However, ethnic compositions and  
96 the national context vary across countries and, to our knowledge, no European study has

1  
2  
3 97 examined the risk of CVD related outcomes in different ethnic groups among breast cancer  
4  
5 98 patients. Hence, the aim of this study was to explore differences in overall CVD event, CVD  
6  
7 99 admission and CVD mortality following a diagnosis of breast cancer between the largest ethnic  
8  
9  
10 100 minority groups in the Netherlands compared with ethnic Dutch.  
11

101

## 102 **2. Methods**

### 103 *Study sample*

104 This register-based cohort study builds on data from different Dutch nationwide registers. The  
105 registries and linkage procedures used in this cohort study have previously been described in  
106 detail [14]. In brief, we linked data between the national Dutch hospital discharge register, the  
107 population register and the cause of death register using a record identification number. This  
108 number is assigned to each resident in the Netherlands with a unique combination of birth date,  
109 sex and postal code (84% of the Dutch population). The Dutch national hospital discharge  
110 register and cause of death register were linked to identify all women with a first admission for  
111 breast cancer between 1996 and 2010, using the International Classification of Diseases (ICD) 9<sup>th</sup>  
112 revision and ICD 10<sup>th</sup> revision. Both patients with invasive (ICD-9: 174 and ICD-10: C50) and in  
113 situ breast cancer (ICD-9: 233 and ICD-10: D05) were identified and men were excluded. Data  
114 from the population register and the cause of death register were available until 2012 and data  
115 from the Dutch hospital discharge register were available until 2010. Individuals were followed  
116 from the date of their first breast cancer admission until (a) CVD admission, (b) CVD death, (c)  
117 death due to other causes, (d) first emigration or (d) study end (31.12.2012), whichever came  
118 first. Linkage of data from the different registries was performed in agreement with the privacy  
119 legislation in The Netherlands. All linkages and analysis were performed in a secured  
120 environment of Statistics Netherlands.

1  
2  
3 121  
4  
5 122 *Ethnic group*  
6  
7  
8 123 Ethnic groups were constructed based on the country of birth of the resident and her parents,  
9  
10 124 according to the definition of Statistics Netherlands [15]. A woman was considered a migrant if  
11  
12 125 she was born abroad or at least one of the parents was born abroad. Women with both parents  
13  
14 126 born in the Netherlands were indicated as being Dutch. The major non-Western migrant groups  
15  
16  
17 127 residing in the Netherlands were included, which are those born in Turkey, Suriname, Morocco,  
18  
19 128 Indonesia, and the Netherlands Antilles.  
20

21 129  
22  
23  
24 130 *Outcomes*  
25  
26 131 CVD admission after a diagnosis of breast cancer was defined as all admissions with either the  
27  
28 132 primary or secondary cause of admission coded as ICD-10: 017.2, 093, 228, 289.1–289.3, 390–  
29  
30 133 459, 557,745–747, 780.2, 782.3, 7825, 7826, 785, 786.50–786.59, 789.2, 794.30–794.39.  
31  
32  
33 134 Cardiovascular mortality was defined as dying from a cardiovascular cause after a diagnosis of  
34  
35 135 breast cancer. Overall cardiovascular event combined the two outcomes and comprised a hospital  
36  
37 136 admission for CVD, and/or a dying from a cardiovascular cause.  
38  
39

40 137  
41  
42 138 *Data analyses*  
43  
44  
45 139 We first presented baseline characteristics as absolute numbers and percentages according to  
46  
47 140 ethnic group. Continuous variables were summarized as mean and standard deviation or as  
48  
49 141 median and interquartile range where appropriate. Subsequently, we calculated hazard ratios  
50  
51 142 (HR) and corresponding 95% confidence intervals (95% CI) using cox proportional hazard  
52  
53 143 regression analyses to assess ethnic differences in overall cardiovascular events, and separately  
54  
55 144 for hospital admission for CVD and cardiovascular mortality between ethnic minority groups and  
56  
57  
58  
59  
60



1  
2  
3 145 the Dutch (reference group) with adjustment for age, year of admission and type of breast cancer.  
4  
5 146 Cox proportional hazard assumptions were checked and met. All analyses were performed using  
6  
7 147 SPSS 22.0 (SPSS Inc., Chicago, IL, USA).  
8  
9

10 148

### 11 149 **3. Results**

12  
13  
14 150 Table 1 presents the characteristics of the study population by ethnic group. In total, 127,714  
15  
16 151 women with a first admission for breast cancer between 01.01.1996 and 31.12.2010 were  
17  
18 152 included in the study, of which 5% belonged to an ethnic minority group (table 1). Dutch women  
19  
20 153 were in general followed for a longer period than the ethnic minority groups. Among migrants,  
21  
22 154 the Antilleans presented the smallest group and the Indonesians the largest group. In general, the  
23  
24 155 ethnic minority groups were younger than the Dutch population when diagnosed. During follow-  
25  
26 156 up, 19% of the Dutch population experienced a hospital admission due to CVD, whereas among  
27  
28 157 the ethnic minorities the proportion of CVD admission ranged from 9% for Moroccans to 19%  
29  
30 158 for Surinamese women. 31,203 women with breast cancer died during follow-up, of which 25%  
31  
32 159 were due to a cardiovascular cause.  
33  
34  
35  
36  
37

38 160  
39  
40 161 Table 2 shows the incidence of a CVD event, which comprises a hospital admission for CVD,  
41  
42 162 and/or dying from a cardiovascular cause, among breast cancer patients by ethnic group.  
43  
44 163 Compared with Dutch women with breast cancer, both Surinamese (HR=1.46;95% CI 1.29–1.64)  
45  
46 164 and Turkish (HR=1.25;95% CI 1.03–1.51) women with breast cancer had a higher incidence of  
47  
48 165 CVD event after adjustment for breast cancer diagnosis, period of breast cancer diagnosis and  
49  
50 166 age. In contrast, Indonesian women with breast cancer had a significantly lower risk (HR=0.88;  
51  
52 167 95% CI 0.81–0.96) of cardiovascular event compared with Dutch women. For Moroccans and  
53  
54 168 Antilleans there were no significant differences from Dutch women.  
55  
56  
57  
58  
59  
60

1  
2  
3 169 Subsequently, we assessed cardiovascular admission and cardiovascular mortality separately.  
4  
5 170 Table 3 shows the unadjusted and adjusted hazard ratios for a cardiovascular admission. Only  
6  
7 171 women from Suriname had a significantly higher risk (HR=1.45; 95% CI 1.28–1.64) of  
8  
9 172 cardiovascular admission compared with Dutch women with breast cancer, whereas women from  
10  
11 173 Indonesia had a significantly lower risk of a cardiovascular admission (HR=0.85; 95% CI 0.78–  
12  
13 174 0.93). The unadjusted and adjusted hazard ratios for cardiovascular mortality for the different  
14  
15 175 ethnic groups are shown in table 4. The adjusted hazard ratios for cardiovascular mortality were  
16  
17 176 significantly higher for women from Suriname (HR=1.49; 95% CI 1.13-1.97) and Turkey  
18  
19 177 (HR=1.96; 95% CI 1.28-3.01), compared with Dutch women, whereas there were no significantly  
20  
21 178 differences between women from Indonesia and Dutch women. For Moroccan and Antillean  
22  
23 179 women the numbers of deaths due to cardiovascular disease were too small to perform analyses.  
24  
25  
26  
27  
28  
29

180

#### 181 **4. Discussion**

##### 182 *Key findings*

183 In this population-based cohort study of women with breast cancer in the Netherlands, the risk of  
184 cardiovascular outcomes varied by ethnic group. Women from Suriname and Turkey had a higher  
185 risk of a CVD event compared with Dutch women with breast cancer. When separating  
186 cardiovascular admission and cardiovascular mortality, Surinamese women had a higher risk of  
187 both cardiovascular admission and cardiovascular mortality, whereas Turkish women only had a  
188 higher risk of cardiovascular mortality compared with Dutch women. In contrast, women from  
189 Indonesia with breast cancer had a lower risk of cardiovascular event, and cardiovascular  
190 admission, but similar risk of cardiovascular mortality compared with ethnic Dutch women with  
191 breast cancer. For Moroccan and Antillean women the risk of a cardiovascular event did not  
192 differ from Dutch women with breast cancer.

1  
2  
3 193 *Discussion of key findings*  
4

5 194 Evidence shows that ethnic minority and migrant groups in general have a lower risk of breast  
6  
7 195 cancer compared with the majority population [16,17]. However, the results of this study indicate  
8  
9  
10 196 that among breast cancer patients, some ethnic minority groups are disadvantaged in terms of  
11  
12 197 cardiovascular outcomes compared with Dutch women. The results of this study are in line with  
13  
14 198 the sparse evidence on ethnic differences in CVD mortality among breast cancer patients in the  
15  
16 199 US, which also found some ethnic minority groups to be disadvantaged in terms of  
17  
18 200 cardiovascular mortality [4,13]. For example, African American women with ductal carcinoma in  
19  
20 201 situ of the breast were found to have a higher risk of CVD death compared with White American  
21  
22 202 women diagnosed with ductal carcinoma in situ of the breast [4]. However, even though CVD  
23  
24 203 have been shown to vary by ethnic group [11,18] data among breast cancer patients in Europe  
25  
26 204 have been lacking. Previous European studies on ethnic disparities in breast cancer prognosis  
27  
28 205 have mostly focused on mortality after breast cancer diagnosis, and found that some ethnic  
29  
30 206 minority groups have higher overall and breast cancer-specific mortality [9,10,19]. Our results  
31  
32 207 thereby add a great value to the existing literature by showing that women with breast cancer  
33  
34 208 from Suriname and Turkey are disadvantaged in terms of cardiovascular outcomes compared  
35  
36 209 with Dutch women with breast cancer. The higher incidence of CVD event among Surinamese  
37  
38 210 women with breast cancer reflects the pattern of CVD among Surinamese women in the general  
39  
40 211 Dutch population. Previous studies of the general population in the Netherlands showed that  
41  
42 212 Surinamese women have a higher risk of both AMI and stroke compared with Dutch women  
43  
44 213 [20,21], as well as a higher 5-year CVD mortality after initial admission for CVD [22]. Turkish  
45  
46 214 women with breast cancer were in the present study found to have a higher incidence of CVD  
47  
48 215 event, compared with Dutch women with breast cancer. However, this only partly reflects on the  
49  
50 216 pattern among Turkish women in the general population in the Netherlands. Previous studies of  
51  
52  
53  
54  
55  
56  
57  
58  
59  
60

1  
2  
3 217 the general population in the Netherlands did not find differences in the incidence of stroke or  
4  
5 218 AMI among Turkish women compared with the Dutch majority women [20,21]. However, when  
6  
7 219 stratifying on age, a higher incidence of AMI were observed in 50- to 70-year-old Turkish  
8  
9  
10 220 women compared with the Dutch majority women [20].

11  
12 221  
13  
14 222 The relatively low risk of CVD outcomes among Indonesian women with breast cancer are in  
15  
16 223 contrast to previous studies of the general Dutch population that found no differences in  
17  
18 224 incidence of AMI and a slightly higher risk of stroke among Indonesians compared with Dutch  
19  
20 225 women [20,21]. The reasons for the better CVD prognosis among Indonesian breast cancer  
21  
22 226 patients are unclear. However, Indonesians are well integrated in the Dutch society with respect  
23  
24 227 to language and culture and have similar income levels and are employed at equal rates as the  
25  
26 228 Dutch general population [23]. This possibly results in better access to health care services than  
27  
28 229 other minority groups and may underlie the better cardiovascular health outcomes among  
29  
30  
31 230 Indonesian women with breast cancer.

32  
33  
34 231  
35  
36 232 Possible explanations for the higher risk of cardiovascular events among Surinamese and Turkish  
37  
38 233 breast cancer patients may include disparities in access to health care services and a high risk  
39  
40 234 factor burden among these ethnic minorities in the Netherlands. Regular health visits are  
41  
42 235 important for early diagnosis of risk factors that can lead to CVD progression and it is possible  
43  
44 236 that differences in health service utilisation may contribute to the observed ethnic differences in  
45  
46 237 CVD risk among breast cancer patients. Evidence on health care utilization among breast cancer  
47  
48 238 patients is scarce, but previous evidence of the general population in the Netherlands suggests  
49  
50 239 that some ethnic minority populations use more general practitioner care than Dutch people do,  
51  
52 240 but that they are less likely to use specialised care [24]. Moreover, ethnic differences in use of

1  
2  
3 241 cardiac rehabilitation and lower adherence to medication therapy have been shown [25–28]. A  
4  
5 242 Danish study found that immigrants from Pakistan and Turkey did not receive adequate medical  
6  
7 243 treatment with beta-blockers after a first AMI compared with Danish-born residents [26]. In  
8  
9 244 addition, in the Netherlands, Surinamese people have been found to have poor blood pressure  
10  
11 245 control compared with their Dutch counterparts [28].  
12  
13  
14  
15 246

16  
17 247 The relatively high incidence of CVD admission and mortality among Turkish and Surinamese  
18  
19 248 breast cancer women may be explained by the high prevalence of cardiovascular risk factors in  
20  
21 249 these populations. The current study lacked information on CVD risk factor and we were  
22  
23 250 therefore not able to address the possible contribution of these to the observed ethnic differences.  
24  
25 251 However, previous studies of Surinamese and Turkish populations in the Netherlands showed  
26  
27 252 that hypertension, diabetes mellitus and obesity are more common among these populations  
28  
29 253 compared with the Dutch general population [28–31]. As an example, a previous Dutch study  
30  
31 254 showed that the prevalence of hypertension, the leading risk factor for CVD worldwide, was  
32  
33 255 higher in both Turkish and Surinamese people than in Dutch people [28]. In addition, a study  
34  
35 256 from the US, found that African American breast cancer patients have higher prevalence of  
36  
37 257 certain CVD risk factors, such as hypertension, diabetes and obesity, prior to initiating aromatase  
38  
39 258 inhibitory therapy, compared with White American breast cancer patients of the same age [32].  
40  
41 259 Evidence suggests that the presence of CVD risk factors among breast cancer patients at  
42  
43 260 diagnosis is a strong predictive factor for the development of cardiovascular damage associated  
44  
45 261 with breast cancer therapy [33]. The higher risk factor burden in some ethnic minority groups  
46  
47 262 may therefore contribute to the higher incidence of CVD in these groups.  
48  
49  
50  
51  
52

53 263 Additionally, since the risk of CVD has been shown to vary according to breast cancer therapy  
54  
55 264 [7,34], the observed differences may be explained by variation in the treatment received by  
56  
57  
58  
59  
60

1  
2  
3 265 different ethnic groups. In the current study, data on treatment was not available. However,  
4  
5 266 studies from the US and UK have reported that ethnic minority women were more likely to  
6  
7 267 receive chemotherapy, which was largely explained by more advanced stage and higher grade  
8  
9  
10 268 tumours [35,36].

11  
12 269  
13  
14 270 Our findings have important clinical and public health implications because identifying breast  
15  
16 271 cancer patients who are most vulnerable to cardiovascular outcomes is important in order to  
17  
18 272 guide strategies among breast cancer patients. The findings suggest the need to increase attention  
19  
20 273 for these women in the cardiovascular risk factor management guidelines in the Netherlands and  
21  
22 274 awareness of the observed ethnic differences in the risk of cardiovascular outcomes among breast  
23  
24 275 cancer patients should be raised among clinicians and incorporated into oncology practices. The  
25  
26 276 observed differences suggest the need for further studies to identify factors explaining these  
27  
28 277 differences. More specific, studies addressing the potential contribution of both CVD risk factors  
29  
30 278 and type of treatment to the observed ethnic differences found in this study are needed. This will  
31  
32 279 help to tailor appropriate public health and clinical interventions to improve outcomes among  
33  
34 280 breast cancer patients most at risk of adverse CVD outcomes.

35  
36  
37  
38  
39  
40 281  
41  
42 282 *Strength and limitations:*  
43  
44 283 The strength of the current study is the validity of the registries, the linkage methods, and the lack  
45  
46 284 of selection of the cohorts. A high validity of both the Dutch National Hospital Discharge  
47  
48 285 Register and the Dutch Population Register has been demonstrated. In a random sample of the  
49  
50 286 Hospital Discharge Register, 99% of the personal, admission and discharge data and 84% of the  
51  
52 287 principal diagnoses (validated through medical record review by medical specialists) were  
53  
54 288 correctly registered [37]. In addition, over 97% of the uniquely linked hospital admissions  
55  
56  
57  
58  
59  
60

1  
2  
3 289 resulting from linkage of the Hospital Discharge Register with the Population Register were  
4  
5 290 shown to be correctly linked [38].  
6

7  
8 291  
9  
10 292 Nonetheless, some limitations must be considered. First, although the study is based on a  
11  
12 293 nationwide cohort of breast cancer patients, absolute numbers are somewhat small when divided  
13  
14 294 into different ethnic groups. Consequently, the numbers were too small to investigate different  
15  
16 295 kinds of CVD, which could have afforded a more nuanced picture. Second, inherent to many  
17  
18 296 national-level databases, we lack detailed data on CVD risk factors, such as smoking, alcohol,  
19  
20 297 cholesterol and obesity, and therefore we were unable to do additional analyses to assess the  
21  
22 298 contribution of these to the observed ethnic differences. However, we were able to shed light on  
23  
24 299 the potential contributing risk factors to the observed differences due to previous studies on  
25  
26 300 ethnic differences in risk factors in the Netherlands [28–31]. Additionally, the study lack data on  
27  
28 301 treatment of breast cancer. Since, CVD risk has been shown to vary according to type of  
29  
30 302 treatment [7,34], adjustment for treatment would have been preferable in order to assess the  
31  
32 303 potential impact of differences in treatment to the observed ethnic differences in CVD. Finally, as  
33  
34 304 in numerous studies, the classifications of the various ethnic groups were based on country of  
35  
36 305 birth. Country of birth may reflect ethnicity reasonably well among some ethnic groups but is  
37  
38 306 likely to be an unreliable proxy measure of ethnicity for other groups such as Surinamese [15].  
39  
40 307 The results may be generalised to other European settings with similar health care services and  
41  
42 308 composition of ethnic groups.  
43  
44  
45  
46  
47  
48

49 309  
50  
51 310 **5. Conclusion**  
52  
53 311 The results of the current study suggest that the risk of CVD related outcomes among breast  
54  
55 312 cancer patients vary by ethnicity. Surinamese and Turkey breast cancer patients experienced a

1  
2  
3 313 higher risk, whereas Indonesian patients had a slightly lower risk of CVD event compared with  
4  
5 314 their Dutch counterparts. More extensive cohort studies are needed to identify the forms of CVD  
6  
7 315 that are most common in these groups as well as the potential factors contributing to these  
8  
9 316 differences.

10  
11  
12 317

13  
14 318 **Competing interest:** None declared.

15  
16  
17 319

18  
19 320 **Funding**

20  
21 321 This work was supported by the Dutch Heart Foundation (grant number 2010B296).

22  
23 322

24  
25 323 **Contributor ship statement**

26  
27 324 LD, JB, IV, MLB, MN, CA were involved in the study design. LD and CA wrote the paper. JB  
28  
29 325 analysed the data. JB, IV, MLB and MN critically revised the manuscript. All Authors approved  
30  
31 326 the final version of the manuscript.

32  
33 327

34  
35 328 **Data sharing statement**

36  
37 329 No additional data are available.

38  
39 330

40  
41 331

42  
43 332

44  
45 333

46  
47 334

48  
49 335

50  
51 336



337 **References**

- 338 [1] C. Allemani, H.K. Weir, H. Carreira, R. Harewood, D. Spika, X.S. Wang, F. Bannon, J. V.  
339 Ahn, C.J. Johnson, A. Bonaventure, R. Marcos-Gragera, C. Stiller, G. Azevedo E Silva,  
340 W.Q. Chen, O.J. Ogunbiyi, B. Rachet, M.J. Soeberg, H. You, T. Matsuda, M. Bielska-  
341 Lasota, H. Storm, T.C. Tucker, M.P. Coleman, Global surveillance of cancer survival  
342 1995-2009: Analysis of individual data for 25 676 887 patients from 279 population-based  
343 registries in 67 countries (CONCORD-2), *Lancet*. 385 (2015) 977–1010.
- 344 [2] S.H. Armenian, L. Xu, B. Ky, C. Sun, L.T. Farol, S.K. Pal, P.S. Douglas, S. Bhatia, C.  
345 Chao, Cardiovascular disease among survivors of adult-onset cancer: A community-based  
346 retrospective cohort study, *J. Clin. Oncol.* 34 (2016) 1122–1130.
- 347 [3] P.T. Bradshaw, J. Stevens, N. Khankari, S.L. Teitelbaum, A.I. Neugut, M.D. Gammon,  
348 Cardiovascular Disease Mortality Among Breast Cancer Survivors, *Epidemiology*. 27  
349 (2016) 6–13.
- 350 [4] A. Berkman, B. F. Cole, P.A. Ades, S. Dickey, S.T. Higgins, A. Trentham-Dietz, B.L.  
351 Sprague, S.G. Lakoski, Racial differences in breast cancer, cardiovascular disease, and all-  
352 cause mortality among women with ductal carcinoma in situ of the breast, *Breast Cancer*  
353 *Res. Treat.* 148 (2014) 407–413.
- 354 [5] J.L. Patnaik, T. Byers, C. DiGuseppi, D. Dabelea, T.D. Denberg, Cardiovascular disease  
355 competes with breast cancer as the leading cause of death for older females diagnosed with  
356 breast cancer: a retrospective cohort study, *Breast Cancer Res.* 13 (2011) R64.
- 357 [6] S.C. Darby, M. Ewertz, P. McGale, A.M. Bennet, U. Blom-Goldman, D. Brønnum, C.  
358 Correa, D. Cutter, G. Gagliardi, B. Gigante, M.-B. Jensen, A. Nisbet, R. Peto, K. Rahimi,  
359 C. Taylor, P. Hall, Risk of ischemic heart disease in women after radiotherapy for breast  
360 cancer., *N. Engl. J. Med.* 368 (2013) 987–98.

- 1  
2  
3 361 [7] P. Thavendiranathan, H. Abdel-Qadir, H.D. Fischer, X. Camacho, E. Amir, P.C. Austin,  
4  
5 362 D.S. Lee, Breast Cancer Therapy-Related Cardiac Dysfunction in Adult Women Treated in  
6  
7 363 Routine Clinical Practice: A Population-Based Cohort Study., *J. Clin. Oncol.* 34 (2016)  
8  
9 364 JCO.2015.65.1505-.
- 10  
11  
12 365 [8] K.E. Weaver, R.E. Foraker, C.M. Alfano, J.H. Rowland, N.K. Arora, K.M. Bellizzi, A.S.  
13  
14 366 Hamilton, I. Oakley-Girvan, G. Keel, N.M. Aziz, Cardiovascular risk factors among long-  
15  
16 367 term survivors of breast, prostate, colorectal, and gynecologic cancers: A gap in  
17  
18 368 survivorship care?, *J. Cancer Surviv.* 7 (2013) 253–261.
- 19  
20  
21 369 [9] H. Møller, K. Henson, M. Luchtenborg, J. Broggio, J. Charman, V.H. Coupland, E.  
22  
23 370 Davies, R.H. Jack, R. Sullivan, P. Vedsted, K. Horgan, N. Pearce, A. Purushotham, Short-  
24  
25 371 term breast cancer survival in relation to ethnicity, stage, grade and receptor status:  
26  
27 372 national cohort study in England, *Br. J. Cancer.* (2016) 1–8.
- 28  
29  
30 373 [10] F. Latif, J. Helgeland, G. Bukholm, I.R.K. Bukholm, Ethnicity differences in breast cancer  
31  
32 374 stage at the time of diagnosis in Norway, *Scand. J. Surg.* 104 (2015) 248–253.
- 33  
34  
35 375 [11] A.A.M. Van Oeffelen, I. Vaartjes, K. Stronks, M.L. Bots, C. Agyemang, Incidence of  
36  
37 376 acute myocardial infarction in first and second generation minority groups: Does the  
38  
39 377 second generation converge towards the majority population?, *Int. J. Cardiol.* 168 (2013)  
40  
41 378 5422–5429.
- 42  
43  
44 379 [12] R.S. Bhopal, N. Bansal, C.M. Fischbacher, H. Brown, S. Capewell, Ethnic variations in  
45  
46 380 heart failure: Scottish Health and Ethnicity Linkage Study (SHELs)., *Heart.* 98 (2012)  
47  
48 381 468–73.
- 49  
50  
51 382 [13] P.A. Solanki, N.Y. Ko, D.M. Qato, G.S. Calip, Risk of cancer-specific, cardiovascular, and  
52  
53 383 all-cause mortality among Asian and Pacific Islander breast cancer survivors in the United  
54  
55 384 States, 1991-2011., *Springerplus.* 5 (2016) 82.

- 1  
2  
3 385 [14] H.L. Koek, A. de Bruin, A. Gast, E. Gevers, J.W.P.F. Kardaun, J.B. Reistma, D.E.  
4  
5 386 Grobbee, M.L. Bots, Incidence of first acute myocardial infarction in the Netherlands, *Neth.*  
6  
7 387 *J. Med.* 65 (2007) 434–441.
- 8  
9  
10 388 [15] K. Stronks, I. Kulu-Glasgow, C. Agyemang, The utility of “country of birth” for the  
11  
12 389 classification of ethnic groups in health research: the Dutch experience., *Ethn. Health.* 14  
13  
14 390 (2009) 255–269.
- 15  
16  
17 391 [16] M. Arnold, M.J. Aarts, S. Siesling, M. Van Der Aa, O. Visser, J.W. Coebergh, Diverging  
18  
19 392 breast and stomach cancer incidence and survival in migrants in The Netherlands, 1996-  
20  
21 393 2009., *Acta Oncol.* 52 (2013) 1195–1201.
- 22  
23  
24 394 [17] T. Gathani, R. Ali, A. Balkwill, J. Green, G. Reeves, V. Beral, K.A. Moser, Million  
25  
26 395 Women Study Collaborators, Ethnic differences in breast cancer incidence in England are  
27  
28 396 due to differences in known risk factors for the disease: prospective study., *Br. J. Cancer.*  
29  
30 397 110 (2014) 224–9.
- 31  
32  
33 398 [18] N.F. Hempler, F.B. Larsen, S.S. Nielsen, F. Diderichsen, A.H. Andreasen, T. Jørgensen, A  
34  
35 399 registry-based follow-up study, comparing the incidence of cardiovascular disease in  
36  
37 400 native Danes and immigrants born in Turkey, Pakistan and the former Yugoslavia: do  
38  
39 401 social inequalities play a role?, *BMC Public Health.* 11 (2011) 662.
- 40  
41  
42 402 [19] E. Copson, T. Maishman, S. Gerty, B. Eccles, L. Stanton, R.I. Cutress, D.G. Altman, L.  
43  
44 403 Durcan, P. Simmonds, L. Jones, W. Tapper, D. Eccles, Ethnicity and outcome of young  
45  
46 404 breast cancer patients in the United Kingdom: the POSH study., *Br. J. Cancer.* 110 (2014)  
47  
48 405 230–41.
- 49  
50  
51 406 [20] A.A.M. Van Oeffelen, C. Agyemang, K. Stronks, M.L. Bots, I. Vaartjes, Incidence of first  
52  
53 407 acute myocardial infarction over time specific for age , sex , and country of birth, (2014)  
54  
55 408 20–27.

- 1  
2  
3 409 [21] C. Agyemang, A.A.M. Van Oeffelen, M. Norredam, L.J. Kappelle, C.J.M. Klijn, M.L.  
4  
5 410 Bots, K. Stronks, I. Vaartjes, Ethnic disparities in ischemic stroke, intracerebral  
6  
7 411 hemorrhage, and subarachnoid hemorrhage incidence in the Netherlands, *Stroke*. 45 (2014)  
8  
9 412 3236–3242.
- 10  
11  
12 413 [22] C. Agyemang, I. Vaartjes, M.L. Bots, I.G. van Valkengoed, J.S. de Munter, A. de Bruin,  
13  
14 414 M. Berger-van Sijl, J.B. Reitsma, K. Stronks, Risk of death after first admission for  
15  
16 415 cardiovascular diseases by country of birth in The Netherlands: a nationwide record-linked  
17  
18 416 retrospective cohort study., *Heart*. 95 (2009) 747–753.
- 19  
20  
21 417 [23] L. Ho, V. Bos, A.E. Kunst, Differences in cause-of-death patterns between the native  
22  
23 418 Dutch and persons of Indonesian descent in the Netherlands, *Am. J. Public Health*. 97  
24  
25 419 (2007) 1616–1618.
- 26  
27  
28 420 [24] K. Stronks, a C. Ravelli, S. a Reijneveld, Immigrants in the Netherlands: equal access for  
29  
30 421 equal needs?, *J. Epidemiol. Community Health*. 55 (2001) 701–707.
- 31  
32  
33 422 [25] O. Cortes, H.M. Arthur, Determinants of referral to cardiac rehabilitation programs in  
34  
35 423 patients with coronary artery disease: A systematic review, *Am. Heart J*. 151 (2006) 249–  
36  
37 424 256.
- 38  
39  
40 425 [26] N.F. Hempler, F. Diderichsen, F.B. Larsen, S. Ladelund, T. Jørgensen, Do immigrants  
41  
42 426 from Turkey, Pakistan and Yugoslavia receive adequate medical treatment with beta-  
43  
44 427 blockers and statins after acute myocardial infarction compared with Danish-born  
45  
46 428 residents? A register-based follow-up study, *Eur. J. Clin. Pharmacol*. 66 (2010) 735–742.
- 47  
48  
49 429 [27] G. Feder, A.M. Crook, P. Magee, S. Banerjee, A.D. Timmis, H. Hemingway, Ethnic  
50  
51 430 differences in invasive management of coronary disease: Prospective cohort study of  
52  
53 431 patients undergoing angiography, *BMJ Br. Med. J*. 324 (2002) 511–516.
- 54  
55  
56 432 [28] C. Agyemang, S. Kieft, M.B. Snijder, E.J. Beune, B.J. Van Den Born, L.M. Brewster, J.J.

- 1  
2  
3 433 Ujcic-Voortman, N. Bindraban, G. Van Montfrans, R.J. Peters, K. Stronks, Hypertension  
4  
5 434 control in a large multi-ethnic cohort in Amsterdam, The Netherlands: The HELIUS study,  
6  
7 435 Int. J. Cardiol. 183 (2015) 180–189.
- 8  
9  
10 436 [29] J.K. Ujcic-Voortman, M.T. Schram, M.A. Jacobs-Van Der Bruggen, A.P. Verhoeff, C.A.  
11  
12 437 Baan, Diabetes prevalence and risk factors among ethnic minorities, Eur. J. Public Health.  
13  
14 438 19 (2009) 511–515.
- 15  
16  
17 439 [30] N.R. Bindraban, I.G.M. van Valkengoed, G. Mairuhu, F. Holleman, J.B.L. Hoekstra,  
18  
19 440 B.P.J. Michels, R.P. Koopmans, K. Stronks, Prevalence of diabetes mellitus and the  
20  
21 441 performance of a risk score among Hindustani Surinamese, African Surinamese and ethnic  
22  
23 442 Dutch: a cross-sectional population-based study., BMC Public Health. 8 (2008) 271.
- 24  
25  
26 443 [31] J.K. Ujcic-Voortman, G. Bos, C.A. Baan, A.P. Verhoeff, J.C. Seidell, Obesity and body fat  
27  
28 444 distribution: Ethnic differences and the role of socio-economic status, Obes. Facts. 4  
29  
30 445 (2011) 53–60.
- 31  
32  
33 446 [32] L. Gallicchio, C. Calhoun, K. Helzlsouer, Cardiovascular Health among Black and White  
34  
35 447 Breast Cancer Patients Initiating Aromatase Inhibitor Therapy, Clin. Breast Cancer. 16  
36  
37 448 (2016) e23–e31.
- 38  
39  
40 449 [33] N. Maurea, C. Coppola, G. Ragone, G. Frasci, A. Bonelli, C. Romano, R.V. Iaffaioli,  
41  
42 450 Women survive breast cancer but fall victim to heart failure: the shadows and lights of  
43  
44 451 targeted therapy., J. Cardiovasc. Med. (Hagerstown). 11 (2010) 861–868.
- 45  
46  
47 452 [34] E.J. Bowles, R. Wellman, H.S. Feigelson, A.A. Onitilo, A.N. Freedman, T. Delate, L.A.  
48  
49 453 Allen, L. Nekhlyudov, K.A. Goddard, R.L. Davis, L.A. Habel, M.U. Yood, C. McCarty,  
50  
51 454 D.J. Magid, E.H. Wagner, P.S. Team, Risk of heart failure in breast cancer patients after  
52  
53 455 anthracycline and trastuzumab treatment: a retrospective cohort study, J. Natl. Cancer Inst.  
54  
55 456 104 (2012) 1293–1305.

- 1  
2  
3 457 [35] R.H. Jack, E.A. Davies, H. Møller, Breast cancer incidence , stage , treatment and survival  
4  
5 458 in ethnic groups in South East England, (2009) 545–550.
- 6  
7 459 [36] B.K. Killelea, V.Q. Yang, S. Wang, B. Hayse, S. Mougalian, N.R. Horowitz, A.B.  
8  
9 Chagpar, L. Pusztai, D.R. Lannin, N.R. Horowitz, B. Anees, Racial Differences in the Use  
10 460 and Outcome of Neoadjuvant Chemotherapy for Breast Cancer : Results From the National  
11 461 Cancer Data Base, 33 (2017) 4267–4276.
- 12  
13  
14 462  
15  
16 463 [37] G. Paas, K. Veenhuizen, Research on the validity of the LMR (in Dutch), Prismant.  
17  
18 (2002).  
19 464
- 20  
21 465 [38] A. De Bruin, J. Kardaun, F. Gast, E. De Bruin, M. Van Sijl, G. Verweij, Record linkage of  
22  
23 hospital discharge register with population register : Experiences at Statistics Netherlands,  
24 466 Stat. Bruin A De, Kardaun J, Gast F, Bruin E De, Sijl M Van, Verweij G. Rec. Link. Hosp.  
25  
26 467 Disch. Regist. with Popul. Regist. Exp. Stat. Netherlands. Stat. (Ber). 2004;2123–32. S.  
27  
28 468  
29  
30 469 21 (2004) 23–32.

33 470

35 471

37 472

39 473

41 474

43 475

45 476

47 477

49 478

51 479

53 480

481 **Table 1** Demographic and disease characteristics of women admitted for breast cancer between  
 482 1996 and 2010 in the Netherlands according to ethnic group

|                                              | <b>Ethnic Dutch</b><br>N % | <b>Antillean</b><br>N % | <b>Indonesian</b><br>N % | <b>Moroccan</b><br>N % | <b>Surinamese</b><br>N % | <b>Turkish</b><br>N % |
|----------------------------------------------|----------------------------|-------------------------|--------------------------|------------------------|--------------------------|-----------------------|
| <b>No. of patients</b>                       | 120,809 (100)              | 454 (100)               | 3,457 (100)              | 919 (100)              | 1,351 (100)              | 724 (100)             |
| <b>Mean age at diagnosis (y), sd</b>         | 60.4 (13.3)                | 52.8 (11.8)             | 57.0 (13.1)              | 47.0 (10.7)            | 52.8 (12.7)              | 49.5 (11.4)           |
| <b>Attained age (y) end of follow-up</b>     |                            |                         |                          |                        |                          |                       |
| ≤ 44                                         | 5,029 (4.2)                | 53 (11.7)               | 206 (6.0)                | 230 (25.0)             | 172 (12.7)               | 125 (17.3)            |
| 45-59                                        | 31,731 (26.3)              | 197 (43.4)              | 1,262 (36.5)             | 476 (51.8)             | 582 (43.1)               | 336 (46.4)            |
| 60-74                                        | 46,671 (38.6)              | 169 (37.2)              | 1,199 (34.7)             | 185 (20.1)             | 421 (31.2)               | 225 (31.1)            |
| ≥ 75                                         | 37,378 (30.9)              | 35 (7.7)                | 790 (22.9)               | 28 (3.0)               | 176 (13.0)               | 38 (5.2)              |
| <b>Follow-up time (y), median (IQR)</b>      | 5.7 (6.8)                  | 4.1 (5.4)               | 5.6 (6.6)                | 4.1 (5.0)              | 4.61 (6.1)               | 4.7 (5.7)             |
| <b>Breast cancer diagnosis</b>               |                            |                         |                          |                        |                          |                       |
| In situ                                      | 9,774 (8.1)                | 45 (9.9)                | 336 (9.7)                | 91 (9.9)               | 131 (9.7)                | 62 (8.6)              |
| Invasive                                     | 111,035 (91.9)             | 409 (90.1)              | 3,121 (90.3)             | 828 (90.1).1           | 1,220 (90.3)             | 662 (91.4)            |
| <b>Period of breast cancer diagnosis (y)</b> |                            |                         |                          |                        |                          |                       |
| 1996-1999                                    | 28,869 (23.9)              | 66 (14.5)               | 743 (21.5)               | 115 (12.5)             | 230 (17.0)               | 104 (14.4)            |
| 2000-2003                                    | 32,196 (26.7)              | 121 (26.7)              | 912 (26.4)               | 201 (21.9)             | 326 (24.1)               | 187 (25.8)            |
| 2004-2007                                    | 33,385 (27.6)              | 139 (30.6)              | 990 (28.6)               | 289 (31.4)             | 420 (31.1)               | 222 (30.7)            |
| 2008-2010                                    | 26,359 (21.8)              | 128 (28.2)              | 812 (23.5)               | 314 (34.2)             | 375 (27.8)               | 211 (29.1)            |
| <b>Marital status</b>                        |                            |                         |                          |                        |                          |                       |
| Single/ widowed/ divorced                    | 53,860 (44.6)              | 268 (59.0)              | 1,701 (49.2)             | 301 (32.8)             | 820 (60.7)               | 277 (38.3)            |
| Living with partner/ married                 | 66,949 (55.4)              | 186 (41.0)              | 1,756 (50.8)             | 618 (67.2)             | 531 (39.3)               | 447 (61.7)            |
| <b>Hospital admissions</b>                   |                            |                         |                          |                        |                          |                       |
| CVD                                          | 23,431 (19.4)              | 68 (15.0)               | 515 (14.9)               | 85 (9.2)               | 259 (19.2)               | 101 (14.0)            |
| - Heart failure                              | 3,426 (2.8)                | 11 (2.4)                | 66 (1.9)                 | 13 (1.4)               | 30 (2.2)                 | 16 (2.2)              |
| - Myocardial infarction                      | 1,482 (1.2)                | <10 <sup>a</sup>        | 25 (0.7)                 | <10 <sup>a</sup>       | <10 <sup>a</sup>         | <10 <sup>a</sup>      |
| - Cerebrovascular disease                    | 3,529 (2.9)                | <10 <sup>a</sup>        | 82 (2.4)                 | <10 <sup>a</sup>       | 34 (2.5)                 | <10 <sup>a</sup>      |
| <b>Death during follow-up</b>                |                            |                         |                          |                        |                          |                       |
| Total deaths                                 | 29,966 (24.8)              | 101 (22.2)              | 665 (19.2)               | 124 (13.5)             | 251 (18.6)               | 96 (13.3)             |
| Breast cancer cause                          | 12,279 (10.2)              | 64 (14.1)               | 301 (8.7)                | 82 (8.9)               | 136 (10.1)               | 51 (7.0)              |
| Cardiovascular cause                         | 7,438 (6.2)                | <10 <sup>a</sup>        | 158 (4.6)                | 11 (1.2)               | 50 (3.7)                 | 21 (2.9)              |
| Other causes                                 | 10,249 (8.5)               | <10                     | 206 (6.0)                | 31 (3.4)               | 65 (4.8)                 | 24 (3.3)              |

Abbreviations: CVD = cardiovascular disease, IQR = Interquartile range, y = years

<sup>a</sup> = Not given in line with the Dutch data protection guideline as the number of cases was less than 10

483

484

485

486 **Table 2** Unadjusted and adjusted hazard ratios (95% CI) for a cardiovascular event by ethnic  
487 group

|                     | <b>Unadjusted<br/>HR (95% CI)</b> | <b>Adjusted<br/>HR (95% CI)</b> |
|---------------------|-----------------------------------|---------------------------------|
| <b>Ethnic group</b> |                                   |                                 |
| Dutch               | 1.00 (Ref.)                       | 1.00 (Ref.)                     |
| Surinamese          | 1.03 (0.92-1.16)                  | 1.46 (1.29-1.64)                |
| Moroccans           | 0.51 (0.42-0.63)                  | 1.01 (0.83-1.24)                |
| Turkish             | 0.71 (0.59-0.86)                  | 1.25 (1.03-1.51)                |
| Antilleans          | 0.83 (0.66-1.04)                  | 1.24 (0.98-1.56)                |
| Indonesians         | 0.76 (0.70-0.82)                  | 0.88 (0.81-0.96)                |

488 Adjusted for age, year of admission and type of breast cancer

489  
490  
491  
492 **Table 3** Unadjusted and adjusted hazard ratios [95% confidence interval] for a cardiovascular  
493 admission by ethnic group

|                     | <b>Unadjusted<br/>HR (95% CI)</b> | <b>Adjusted<br/>HR (95% CI)</b> |
|---------------------|-----------------------------------|---------------------------------|
| <b>Ethnic group</b> |                                   |                                 |
| Dutch               | 1.00 (Ref.)                       | 1.00 (Ref.)                     |
| Surinamese          | 1.09 (0.96-1.23)                  | 1.45 (1.28-1.64)                |
| Moroccans           | 0.53 (0.43-0.66)                  | 0.92 (0.75 -1.14)               |
| Turkish             | 0.76 (0.63-0.93)                  | 1.21(0.99-1.47)                 |
| Antilleans          | 0.89 (0.70-1.13)                  | 1.24 (0.98-1.57)                |
| Indonesians         | 0.75 (0.69-0.82)                  | 0.85 (0.78-0.93)                |

494 Adjusted for age, year of admission and type of breast cancer

495  
496  
497  
498 **Table 4** Unadjusted and adjusted hazard ratios for cardiovascular mortality by ethnic group

|                     | <b>Unadjusted<br/>HR (95% CI)</b> | <b>Adjusted<br/>HR (95% CI)</b> |
|---------------------|-----------------------------------|---------------------------------|
| <b>Ethnic group</b> |                                   |                                 |
| Dutch               | 1.00 (Ref.)                       | 1.00 (Ref.)                     |
| Surinamese          | 0.70 (0.53-0.93)                  | 1.49 (1.13-1.97)                |
| Turkish             | 0.55 (0.36-0.84)                  | 1.96 (1.27-3.01)                |
| Indonesians         | 0.76 (0.65-0.89)                  | 0.99 (0.84-1.16)                |

499 Adjusted for age, year of admission and type of breast cancer

500 The number of cardiovascular mortality for the Antilleans and Moroccan women were too low.



**STROBE 2007 (v4) checklist of items to be included in reports of observational studies in epidemiology\***  
**Checklist for cohort, case-control, and cross-sectional studies (combined)**

| Section/Topic             | Item # | Recommendation                                                                                                                                                                                                                                                                                                                                                                                                                                                         | Reported on page # |
|---------------------------|--------|------------------------------------------------------------------------------------------------------------------------------------------------------------------------------------------------------------------------------------------------------------------------------------------------------------------------------------------------------------------------------------------------------------------------------------------------------------------------|--------------------|
| Title and abstract        | 1      | (a) Indicate the study’s design with a commonly used term in the title or the abstract                                                                                                                                                                                                                                                                                                                                                                                 | 1 and 2            |
|                           |        | (b) Provide in the abstract an informative and balanced summary of what was done and what was found                                                                                                                                                                                                                                                                                                                                                                    | 2                  |
| <b>Introduction</b>       |        |                                                                                                                                                                                                                                                                                                                                                                                                                                                                        |                    |
| Background/rationale      | 2      | Explain the scientific background and rationale for the investigation being reported                                                                                                                                                                                                                                                                                                                                                                                   | 4                  |
| Objectives                | 3      | State specific objectives, including any pre-specified hypotheses                                                                                                                                                                                                                                                                                                                                                                                                      | 5                  |
| <b>Methods</b>            |        |                                                                                                                                                                                                                                                                                                                                                                                                                                                                        |                    |
| Study design              | 4      | Present key elements of study design early in the paper                                                                                                                                                                                                                                                                                                                                                                                                                | 5                  |
| Setting                   | 5      | Describe the setting, locations, and relevant dates, including periods of recruitment, exposure, follow-up, and data collection                                                                                                                                                                                                                                                                                                                                        | 5                  |
| Participants              | 6      | (a) <i>Cohort study</i> —Give the eligibility criteria, and the sources and methods of selection of participants. Describe methods of follow-up<br><i>Case-control study</i> —Give the eligibility criteria, and the sources and methods of case ascertainment and control selection. Give the rationale for the choice of cases and controls<br><i>Cross-sectional study</i> —Give the eligibility criteria, and the sources and methods of selection of participants | 5                  |
|                           |        | (b) <i>Cohort study</i> —For matched studies, give matching criteria and number of exposed and unexposed<br><i>Case-control study</i> —For matched studies, give matching criteria and the number of controls per case                                                                                                                                                                                                                                                 |                    |
| Variables                 | 7      | Clearly define all outcomes, exposures, predictors, potential confounders, and effect modifiers. Give diagnostic criteria, if applicable                                                                                                                                                                                                                                                                                                                               | 6                  |
| Data sources/ measurement | 8*     | For each variable of interest, give sources of data and details of methods of assessment (measurement). Describe comparability of assessment methods if there is more than one group                                                                                                                                                                                                                                                                                   | 5 and 6            |
| Bias                      | 9      | Describe any efforts to address potential sources of bias                                                                                                                                                                                                                                                                                                                                                                                                              | 6 and 7            |
| Study size                | 10     | Explain how the study size was arrived at                                                                                                                                                                                                                                                                                                                                                                                                                              | 7                  |
| Quantitative variables    | 11     | Explain how quantitative variables were handled in the analyses. If applicable, describe which groupings were chosen and why                                                                                                                                                                                                                                                                                                                                           | 6                  |
| Statistical methods       | 12     | (a) Describe all statistical methods, including those used to control for confounding                                                                                                                                                                                                                                                                                                                                                                                  | 6 and 7            |
|                           |        | (b) Describe any methods used to examine subgroups and interactions                                                                                                                                                                                                                                                                                                                                                                                                    | -                  |
|                           |        | (c) Explain how missing data were addressed                                                                                                                                                                                                                                                                                                                                                                                                                            | -                  |
|                           |        | (d) <i>Cohort study</i> —If applicable, explain how loss to follow-up was addressed<br><i>Case-control study</i> —If applicable, explain how matching of cases and controls was addressed                                                                                                                                                                                                                                                                              | -                  |

|                          |     |                                                                                                                                                                                                              |                            |
|--------------------------|-----|--------------------------------------------------------------------------------------------------------------------------------------------------------------------------------------------------------------|----------------------------|
|                          |     | <i>Cross-sectional study</i> —If applicable, describe analytical methods taking account of sampling strategy                                                                                                 |                            |
|                          |     | (e) Describe any sensitivity analyses                                                                                                                                                                        | -                          |
| <b>Results</b>           |     |                                                                                                                                                                                                              |                            |
| Participants             | 13* | (a) Report numbers of individuals at each stage of study—eg numbers potentially eligible, examined for eligibility, confirmed eligible, included in the study, completing follow-up, and analysed            | 7                          |
|                          |     | (b) Give reasons for non-participation at each stage                                                                                                                                                         | -                          |
|                          |     | (c) Consider use of a flow diagram                                                                                                                                                                           | -                          |
| Descriptive data         | 14* | (a) Give characteristics of study participants (eg demographic, clinical, social) and information on exposures and potential confounders                                                                     | 7 and 21 (table 1)         |
|                          |     | (b) Indicate number of participants with missing data for each variable of interest                                                                                                                          | -                          |
|                          |     | (c) <i>Cohort study</i> —Summarise follow-up time (eg, average and total amount)                                                                                                                             | 21 (table 1)               |
| Outcome data             | 15* | <i>Cohort study</i> —Report numbers of outcome events or summary measures over time                                                                                                                          | 7 and 21 (table 1)         |
|                          |     | <i>Case-control study</i> —Report numbers in each exposure category, or summary measures of exposure                                                                                                         |                            |
|                          |     | <i>Cross-sectional study</i> —Report numbers of outcome events or summary measures                                                                                                                           |                            |
| Main results             | 16  | (a) Give unadjusted estimates and, if applicable, confounder-adjusted estimates and their precision (eg, 95% confidence interval). Make clear which confounders were adjusted for and why they were included | 7,8, and 22 (table 2, 3,4) |
|                          |     | (b) Report category boundaries when continuous variables were categorized                                                                                                                                    | -                          |
|                          |     | (c) If relevant, consider translating estimates of relative risk into absolute risk for a meaningful time period                                                                                             | -                          |
| Other analyses           | 17  | Report other analyses done—eg analyses of subgroups and interactions, and sensitivity analyses                                                                                                               | -                          |
| <b>Discussion</b>        |     |                                                                                                                                                                                                              |                            |
| Key results              | 18  | Summarise key results with reference to study objectives                                                                                                                                                     | 8                          |
| Limitations              | 19  | Discuss limitations of the study, taking into account sources of potential bias or imprecision. Discuss both direction and magnitude of any potential bias                                                   | 12 - 13                    |
| Interpretation           | 20  | Give a cautious overall interpretation of results considering objectives, limitations, multiplicity of analyses, results from similar studies, and other relevant evidence                                   | 9-12                       |
| Generalisability         | 21  | Discuss the generalisability (external validity) of the study results                                                                                                                                        | 13                         |
| <b>Other information</b> |     |                                                                                                                                                                                                              |                            |
| Funding                  | 22  | Give the source of funding and the role of the funders for the present study and, if applicable, for the original study on which the present article is based                                                | 14                         |

\*Give information separately for cases and controls in case-control studies and, if applicable, for exposed and unexposed groups in cohort and cross-sectional studies.

1  
2  
3  
4  
5  
6  
7  
8  
9  
10  
11  
12  
13  
14  
15  
16  
17  
18  
19  
20  
21  
22  
23  
24  
25  
26  
27  
28  
29  
30  
31  
32  
33  
34  
35  
36  
37  
38  
39  
40  
41  
42  
43  
44  
45  
46  
47

**Note:** An Explanation and Elaboration article discusses each checklist item and gives methodological background and published examples of transparent reporting. The STROBE checklist is best used in conjunction with this article (freely available on the Web sites of PLoS Medicine at <http://www.plosmedicine.org/>, Annals of Internal Medicine at <http://www.annals.org/>, and Epidemiology at <http://www.epidem.com/>). Information on the STROBE Initiative is available at [www.strobe-statement.org](http://www.strobe-statement.org).

For peer review only

# BMJ Open

## Ethnic differences in cardiovascular morbidity and mortality among breast cancer patients in the Netherlands: a register-based cohort study.

|                                 |                                                                                                                                                                                                                                                                                                                                                                                                                                                                                                                                                                                                                                                                                                                                                                                                                                                                                                              |
|---------------------------------|--------------------------------------------------------------------------------------------------------------------------------------------------------------------------------------------------------------------------------------------------------------------------------------------------------------------------------------------------------------------------------------------------------------------------------------------------------------------------------------------------------------------------------------------------------------------------------------------------------------------------------------------------------------------------------------------------------------------------------------------------------------------------------------------------------------------------------------------------------------------------------------------------------------|
| Journal:                        | <i>BMJ Open</i>                                                                                                                                                                                                                                                                                                                                                                                                                                                                                                                                                                                                                                                                                                                                                                                                                                                                                              |
| Manuscript ID                   | bmjopen-2018-021509.R1                                                                                                                                                                                                                                                                                                                                                                                                                                                                                                                                                                                                                                                                                                                                                                                                                                                                                       |
| Article Type:                   | Research                                                                                                                                                                                                                                                                                                                                                                                                                                                                                                                                                                                                                                                                                                                                                                                                                                                                                                     |
| Date Submitted by the Author:   | 13-Apr-2018                                                                                                                                                                                                                                                                                                                                                                                                                                                                                                                                                                                                                                                                                                                                                                                                                                                                                                  |
| Complete List of Authors:       | Deen, Laura; University of Amsterdam, Department of Public Health, Academic Medical Centre; Copenhagen University Hospital, Section of Immigrant Medicine, Department of Infectious Diseases<br>Buddeke, Josefiën; University Medical Centre Utrecht, Julius Centre for Health Sciences and Primary Care<br>Vaartjes, Ilonca; University Medical Centre Utrecht, Julius Centre for Health Sciences and Primary Care<br>Bots, Michiel; University Medical Center Utrecht, Julius Centre for Health Sciences and Primary Care<br>Nørredam, Marie; University of Copenhagen, Danish Research Centre for Migration, Ethnicity and Health, Section of Health Services Research, Department of Public Health; Copenhagen University Hospital, Section of Immigrant Medicine, Department of Infectious Diseases<br>Agyemang, Charles; University of Amsterdam, Department of Public Health, Academic Medical Center |
| <b>Primary Subject Heading</b>: | Public health                                                                                                                                                                                                                                                                                                                                                                                                                                                                                                                                                                                                                                                                                                                                                                                                                                                                                                |
| Secondary Subject Heading:      | Epidemiology, Oncology, Cardiovascular medicine                                                                                                                                                                                                                                                                                                                                                                                                                                                                                                                                                                                                                                                                                                                                                                                                                                                              |
| Keywords:                       | Ethnicity, breast cancer, migrant, cardiovascular disease, cardiovascular mortality                                                                                                                                                                                                                                                                                                                                                                                                                                                                                                                                                                                                                                                                                                                                                                                                                          |
|                                 |                                                                                                                                                                                                                                                                                                                                                                                                                                                                                                                                                                                                                                                                                                                                                                                                                                                                                                              |

SCHOLARONE™  
Manuscripts

1  
2  
3 1 **Ethnic differences in cardiovascular morbidity and mortality among breast cancer patients**  
4  
5 2 **in the Netherlands: a register-based cohort study.**  
6  
7  
8  
9

10 4 Laura Deen, MSC<sup>1,2</sup>; Josefiën Buddeke, MSC<sup>3</sup>; Ilonca Vaartjes, PhD<sup>3</sup>; Michiel L. Bots, MD  
11  
12 5 PhD<sup>3</sup>; Marie Norredam, MD PhD<sup>2,4</sup>; Charles Agyemang, MPH, PhD<sup>1</sup>  
13

14 6 <sup>1</sup>*Department of Public Health, Academic Medical Centre, University of Amsterdam, Amsterdam*  
15  
16  
17 7 *Meibergdreef 9, 1105 AZ Amsterdam-Zuidoost, The Netherlands*  
18

19 8 <sup>2</sup>*Section of Immigrant Medicine, Department of Infectious Diseases, Copenhagen University*  
20  
21 9 *Hospital, Kettegård allé 30, 2650 Hvidovre, Denmark*  
22

23  
24 10 <sup>3</sup>*Julius Centre for Health Sciences and Primary Care, University Medical Centre Utrecht,*  
25  
26 11 *Heidelberglaan 100, 3584 CX Utrecht, The Netherlands*  
27

28 12 <sup>4</sup>*Danish Research Centre for Migration, Ethnicity and Health, Section of Health Services*  
29  
30 13 *Research, Department of Public Health, University of Copenhagen, Øster Farimagsgade 5, 1014*  
31  
32 14 *København K, Denmark*  
33  
34

35 15  
36  
37 16 Corresponding author:  
38  
39 17 Laura Deen, *Department of Public Health, Academic Medical Centre, University of Amsterdam,*  
40  
41 18 *Amsterdam Meibergdreef 9, 1105 AZ Amsterdam-Zuidoost, The Netherlands*  
42  
43

44 19 e-mail: [nhq382@alumni.ku.dk](mailto:nhq382@alumni.ku.dk), telephone.: +4527514559  
45  
46

47 20  
48  
49 21 **Word count:**  
50  
51 22 Abstract: 250.  
52  
53 23 Total manuscript (excluding references, tables and figures): 3214.  
54  
55

56 24  
57  
58  
59  
60

1  
2  
3 **Abstract**  
4

5 **Objectives:** Cardiovascular disease (CVD) is of increasing concern among breast cancer  
6  
7 survivors. However, evidence on ethnic differences in CVD among women with breast cancer is  
8  
9 sparse. We assessed ethnic differences in cardiovascular morbidity and mortality among breast  
10  
11 cancer patients in the Netherlands.  
12  
13  
14  
15  
16

17 **Methods:** A nationwide register-based cohort study comprising all women with a first admission  
18  
19 for breast cancer (n=127,714) between 1996 and 2010 in the Netherlands was conducted.  
20  
21 Differences in CVD admission, CVD mortality and overall CVD event, which comprised a CVD  
22  
23 admission and/or CVD mortality, between the largest ethnic minority groups (Surinamese,  
24  
25 Moroccan, Turkish, Antillean, and Indonesian) and the Dutch general population (henceforth,  
26  
27 Dutch) were investigated using Cox proportional hazard models.  
28  
29  
30  
31  
32

33 **Results:** The incidence of cardiovascular outcomes varied by ethnic group. The incidence of an  
34  
35 overall cardiovascular event was significantly higher for women with breast cancer from  
36  
37 Suriname (HR=1.46;95% CI 1.29–1.64) and Turkey (HR=1.25;95% CI 1.03–1.51), compared  
38  
39 with Dutch women with breast cancer. In contrast, Indonesian women with breast cancer had a  
40  
41 significantly lower risk (HR=0.88; 95% CI 0.81–0.96) of a cardiovascular event compared with  
42  
43 Dutch women with breast cancer. The risk of a cardiovascular event did not differ between  
44  
45 Moroccan and Dutch women with breast cancer, whereas for Antillean women the risk was not  
46  
47 significantly higher.  
48  
49  
50  
51  
52

53  
54  
55  
56  
57  
58  
59  
60

1  
2  
3 47 **Conclusions:** Our findings suggest that Surinamese and Turkish women with breast cancer are  
4  
5 48 disadvantaged in terms of cardiovascular outcomes compared with Dutch women with breast  
6  
7 49 cancer. More work is needed to unravel the potential factors contributing to these differences.  
8  
9

10 50

11  
12 51 **Strengths and limitations of this study:**

- 13 52 • The study builds on data from nationwide registries which resulted in a large sample size.  
14  
15  
16 53 • The validity of the linkage of the included registries has proved to be high.  
17  
18 54 • Although the study is based on a nationwide cohort of breast cancer patients, absolute  
19  
20 55 numbers are somewhat small when divided into different ethnic groups.  
21  
22  
23 56 • Data on CVD risk factors, such as smoking, alcohol and obesity were not available since the  
24  
25 57 study builds on registry data.  
26  
27

28 58

29  
30 59

31  
32 60

33  
34 61

35  
36 62

37  
38 63

39  
40 64

41  
42 65

43  
44 66

45  
46 67

47  
48 68

49  
50 69

51  
52 70

## 1. Introduction

Due to earlier diagnosis and more effective treatment, the survival rate among breast cancer patients has now improved resulting in a growing population of breast cancer survivors. In The Netherlands, the 5-year-age-standardized survival rate has increased from 80% in 1995-99 to 85% in 2005-09 [1]. With breast cancer becoming a curable disease, comorbidities and death from other conditions among breast cancer survivors are of increasing concern.

One of the most important comorbidities to consider in women with breast cancer is cardiovascular disease (CVD), and with the growing number of breast cancer survivors, a better understanding of the risk of CVD in this group is crucial. Studies show that women surviving breast cancer have an increased risk of CVD morbidity and CVD-specific mortality compared with women without breast cancer [2,3]. Moreover, among breast cancer survivors, CVD-related mortality is becoming more common than breast cancer-specific mortality [4,5]. This is attributable to improvements in breast cancer survival due to early detection by screening programs and improved treatments [6,7]. Additionally, cardiotoxic effects of breast cancer therapy play a role [8,9]. Further, survivors are typically older than the general population and may be more likely to develop CVD because of risk factors common to both cancer and CVD [10].

Evidence suggests ethnic inequalities in the prognosis of breast cancer with a higher risk of breast cancer-specific and overall mortality among some ethnic minority groups [11,12]. However, although ethnic variation in cardiovascular outcomes in the general population exists [13,14], the evidence among breast cancer patients is limited. Data from the US show that African American and Pacific Islander women with breast cancer had an increased risk of dying from CVD



1  
2  
3 95 compared with White American breast cancer patients [4,15]. However, ethnic compositions and  
4  
5 96 the national context vary across countries and, to our knowledge, no European study has  
6  
7 97 examined the risk of CVD related outcomes in different ethnic groups among breast cancer  
8  
9 98 patients. Hence, the aim of this study was to explore differences in overall CVD event, CVD  
10  
11 99 admission and CVD mortality following a diagnosis of breast cancer between the largest ethnic  
12  
13  
14 100 minority groups in the Netherlands compared with ethnic Dutch.  
15  
16  
17 101

## 19 102 **2. Methods**

### 21 103 *Study sample*

23 104 This register-based cohort study builds on data from different Dutch nationwide registers. The  
24  
25 105 registries and linkage procedures used in this cohort study have previously been described in  
26  
27 106 detail [16]. In brief, we linked data between the national Dutch hospital discharge register, the  
28  
29 107 population register and the cause of death register using a record identification number. This  
30  
31 108 number is assigned to each resident in the Netherlands with a unique combination of birth date,  
32  
33 109 sex and postal code (84% of the Dutch population). The Dutch national hospital discharge  
34  
35 110 register and cause of death register were linked to identify all women with a first admission for  
36  
37 111 breast cancer between 1996 and 2010, using the International Classification of Diseases (ICD) 9<sup>th</sup>  
38  
39 112 revision and ICD 10<sup>th</sup> revision. Both patients with invasive (ICD-9: 174 and ICD-10: C50) and in  
40  
41 113 situ breast cancer (ICD-9: 233 and ICD-10: D05) were identified and men were excluded. Data  
42  
43 114 from the population register and the cause of death register were available until 2012 and data  
44  
45 115 from the Dutch hospital discharge register were available until 2010. Individuals were followed  
46  
47 116 from the date of their first breast cancer admission until (a) CVD admission, (b) CVD death, (c)  
48  
49 117 death due to other causes, (d) first emigration or (d) study end (31.12.2012), whichever came  
50  
51 118 first. Linkage of data from the different registries was performed in agreement with the privacy  
52  
53  
54  
55  
56  
57  
58  
59  
60

1  
2  
3 119 legislation in The Netherlands. All linkages and analysis were performed in a secured  
4  
5 120 environment of Statistics Netherlands. The data set was made available and analysed in an  
6  
7 121 anonymous form in a secured environment of Statistics Netherlands. Prior to publication,  
8  
9 122 Statistics Netherlands made sure that none of the analysis results showed potential reducibility to  
10  
11 123 the individual level.  
12  
13  
14  
15

16  
17 124  
18  
19 125 *Ethnic group*  
20  
21 126 Ethnic groups were constructed based on the country of birth of the resident and her parents,  
22  
23 127 according to the definition of Statistics Netherlands [17]. A woman was considered a migrant if  
24  
25 128 she was born abroad or at least one of the parents was born abroad. Women with both parents  
26  
27 129 born in the Netherlands were indicated as being Dutch. The major migrant groups residing in the  
28  
29 130 Netherlands were included, which are those born in Turkey, Suriname, Morocco, Indonesia, and  
30  
31 131 the Netherlands Antilles.  
32  
33  
34

35 132  
36 133 *Outcomes*  
37  
38 134 CVD admission after a diagnosis of breast cancer was defined as all admissions with either the  
39  
40 135 primary or secondary cause of admission coded as ICD-9: 017.2, 093, 228, 289.1–289.3, 390–  
41  
42 136 459, 557,745–747, 780.2, 782.3, 7825, 7826, 785, 786.50–786.59, 789.2, 794.30–794.39.  
43  
44 137 Cardiovascular mortality was defined as dying from a cardiovascular cause after a diagnosis of  
45  
46 138 breast cancer.  
47  
48

49 139 Overall cardiovascular event combined the two outcomes and comprised a hospital admission for  
50  
51 140 CVD, and/or a dying from a cardiovascular cause.  
52  
53

54 141  
55  
56 142 *Data analyses*  
57  
58  
59

1  
2  
3 143 We first presented baseline characteristics as absolute numbers and percentages according to  
4  
5 144 ethnic group. Continuous variables were summarized as mean and standard deviation or as  
6  
7 145 median and interquartile range where appropriate. Subsequently, we calculated hazard ratios  
8  
9 146 (HR) and corresponding 95% confidence intervals (95% CI) using cox proportional hazard  
10  
11 147 regression analyses to assess ethnic differences in overall cardiovascular events, and separately  
12  
13 148 for hospital admission for CVD and cardiovascular mortality between ethnic minority groups and  
14  
15 149 the Dutch (reference group) with adjustment for age as a continuous variable, year of admission  
16  
17 150 and type of breast cancer. Cox proportional hazard assumptions were tested by plotting the log  
18  
19 151 minus log functions for the continuous variable age. The assumptions were met in all analyses.  
20  
21  
22  
23 152 All analyses were performed using SPSS 22.0 (SPSS Inc., Chicago, IL, USA).  
24  
25  
26 153

#### 27 28 154 *Patient and Public Involvement*

29  
30  
31 155 No patient or public were involved in this study.  
32  
33 156

### 34 35 157 **3. Results**

36  
37 158 Table 1 presents the characteristics of the study population by ethnic group. In total, 127,714  
38  
39 159 women with a first admission for breast cancer between 01.01.1996 and 31.12.2010 were  
40  
41 160 included in the study, of which 5% belonged to an ethnic minority group (table 1). Women with  
42  
43 161 more adverse outcomes were in general followed for a shorter period. Among migrants, the  
44  
45 162 Antilleans presented the smallest group and the Indonesians the largest group. In general, the  
46  
47 163 ethnic minority groups were younger than the Dutch population when diagnosed. During follow-  
48  
49 164 up, 19% of the Dutch population experienced a hospital admission due to CVD, whereas among  
50  
51  
52  
53 165 the ethnic minorities the proportion of CVD admission ranged from 9% for Moroccans to 19%

1  
2  
3 166 for Surinamese women. 31,203 women with breast cancer died during follow-up, of which 25%  
4  
5 167 were due to a cardiovascular cause.

6  
7 168 Table 2 shows the incidence of a CVD event, which comprises a hospital admission for CVD,  
8  
9  
10 169 and/or dying from a cardiovascular cause, among breast cancer patients by ethnic group.  
11  
12 170 Compared with Dutch women with breast cancer, both Surinamese (HR=1.46;95% CI 1.29–1.64)  
13  
14 171 and Turkish (HR=1.25;95% CI 1.03–1.51) women with breast cancer had a higher incidence of  
15  
16 172 CVD event after adjustment for breast cancer diagnosis, period of breast cancer diagnosis and  
17  
18 173 age. In contrast, Indonesian women with breast cancer had a significantly lower risk (HR=0.88;  
19  
20 174 95% CI 0.81–0.96) of cardiovascular event compared with Dutch women. Although not  
21  
22 175 significant, the Antillean women had a higher incidence of CVD event compared with Dutch  
23  
24 176 women. For Moroccans, there were no significant differences from Dutch women.

25  
26  
27 177 Subsequently, we assessed cardiovascular admission and cardiovascular mortality separately.  
28  
29 178 Table 3 shows the unadjusted and adjusted hazard ratios for a cardiovascular admission. Only  
30  
31 179 women from Suriname had a significantly higher risk (HR=1.45; 95% CI 1.28–1.64) of  
32  
33 180 cardiovascular admission compared with Dutch women with breast cancer, whereas women from  
34  
35 181 Indonesia had a significantly lower risk of a cardiovascular admission (HR=0.85; 95% CI 0.78–  
36  
37 182 0.93). The unadjusted and adjusted hazard ratios for cardiovascular mortality for the different  
38  
39 183 ethnic groups are shown in table 4. The adjusted hazard ratios for cardiovascular mortality were  
40  
41 184 significantly higher for women from Suriname (HR=1.49; 95% CI 1.13–1.97) and Turkey  
42  
43 185 (HR=1.96; 95% CI 1.28–3.01), compared with Dutch women, whereas there were no significant  
44  
45 186 differences between women from Indonesia and Dutch women. For Moroccan and Antillean  
46  
47 187 women the numbers of deaths due to CVD were too small to perform analyses. In order to  
48  
49 188 determine the impact of breast cancer treatment on the observed differences in CVD outcomes a  
50  
51 189 sensitivity analysis was performed excluding all women with in situ breast cancer. This did not  
52  
53  
54  
55  
56  
57  
58  
59  
60

1  
2  
3 190 change the results significantly, suggesting that cancer status and treatment of cancer is not strongly  
4  
5 191 related to CVD outcomes in our study.  
6

7 192  
8

#### 9 193 **4. Discussion**

##### 10 194 *Key findings*

11  
12  
13  
14 195 In this population-based cohort study of women with breast cancer in the Netherlands, the risk of  
15  
16 196 cardiovascular outcomes varied by ethnic group. Women from Suriname and Turkey had a higher  
17  
18 197 risk of a CVD event compared with Dutch women with breast cancer. When separating  
19  
20 198 cardiovascular admission and cardiovascular mortality, Surinamese and Turkish women had a  
21  
22 199 higher risk of both cardiovascular admission and cardiovascular mortality compared with Dutch  
23  
24 200 women, though in Turkish women the results for CVD admission was not significant. In contrast,  
25  
26 201 women from Indonesia with breast cancer had a lower risk of cardiovascular event, and  
27  
28 202 cardiovascular admission, but similar risk of cardiovascular mortality compared with ethnic  
29  
30 203 Dutch women with breast cancer. For Moroccan women, the risk of a cardiovascular event did  
31  
32 204 not differ from Dutch women with breast cancer, whereas for Antillean women the risk was not  
33  
34 205 significantly higher.  
35  
36  
37  
38  
39

40 206

##### 41 207 *Discussion of key findings*

42  
43  
44 208 Evidence shows that ethnic minority and migrant groups in general have a lower risk of breast  
45  
46 209 cancer compared with the majority population [18,19]. However, the results of this study indicate  
47  
48 210 that among breast cancer patients, some ethnic minority groups are disadvantaged in terms of  
49  
50 211 cardiovascular outcomes compared with Dutch women. The results of this study are in line with  
51  
52 212 the sparse evidence on ethnic differences in CVD mortality among breast cancer patients in the  
53  
54 213 US, which also found some ethnic minority groups to be disadvantaged in terms of  
55  
56  
57  
58  
59

1  
2  
3 214 cardiovascular mortality [4,15]. For example, African America women with ductal carcinoma in  
4  
5 215 situ of the breast were found to have a higher risk of CVD death compared with White American  
6  
7 216 women diagnosed with ductal carcinoma in situ of the breast [4]. However, even though CVD  
8  
9  
10 217 have been shown to vary by ethnic group [13,20] data among breast cancer patients in Europe  
11  
12 218 have been lacking. Previous European studies on ethnic disparities in breast cancer prognosis  
13  
14 219 have mostly focused on mortality after breast cancer diagnosis, and found that some ethnic  
15  
16 220 minority groups have higher overall and breast cancer-specific mortality [11,12,21]. Our results  
17  
18 221 thereby add a great value to the existing literature by showing that women with breast cancer  
19  
20 222 from Suriname and Turkey are disadvantaged in terms of cardiovascular outcomes compared  
21  
22 223 with Dutch women with breast cancer. The higher incidence of CVD event among Surinamese  
23  
24 224 women with breast cancer reflects the pattern of CVD among Surinamese women in the general  
25  
26 225 Dutch population. Previous studies of the general population in the Netherlands showed that  
27  
28 226 Surinamese women have a higher risk of both AMI and stroke compared with Dutch women  
29  
30 227 [22,23], as well as a higher 5-year CVD mortality after initial admission for CVD [24]. Turkish  
31  
32 228 women with breast cancer were in the present study found to have a higher incidence of CVD  
33  
34 229 event, compared with Dutch women with breast cancer. However, this only partly reflects on the  
35  
36 230 pattern among Turkish women in the general population in the Netherlands. Previous studies of  
37  
38 231 the general population in the Netherlands did not find differences in the incidence of stroke or  
39  
40 232 AMI among Turkish women compared with the Dutch majority women [22,23]. However, when  
41  
42 233 stratifying on age, a higher incidence of AMI were observed in 50- to 70-year-old Turkish  
43  
44 234 women compared with the Dutch majority women [22].  
45  
46  
47  
48  
49  
50

51 235  
52  
53 236 The relatively low risk of CVD outcomes among Indonesian women with breast cancer are in  
54  
55 237 contrast to previous studies of the general Dutch population that found no differences in  
56  
57  
58  
59  
60

1  
2  
3 238 incidence of AMI and a slightly higher risk of stroke among Indonesians compared with Dutch  
4  
5 239 women [22,23]. The reasons for the better CVD prognosis among Indonesian breast cancer  
6  
7 240 patients are unclear. However, Indonesians are well integrated in the Dutch society with respect  
8  
9  
10 241 to language and culture and have similar income levels and are employed at equal rates as the  
11  
12 242 Dutch general population [25]. This possibly results in better access to health care services than  
13  
14 243 other minority groups and may underlie the better cardiovascular health outcomes among  
15  
16  
17 244 Indonesian women with breast cancer.  
18

19 245  
20  
21 246 Possible explanations for the higher risk of cardiovascular events among Surinamese and Turkish  
22  
23 247 breast cancer patients may include disparities in access to health care services and a high risk  
24  
25  
26 248 factor burden among these ethnic minorities in the Netherlands. Regular health visits are  
27  
28 249 important for early diagnosis of risk factors that can lead to CVD progression and it is possible  
29  
30 250 that differences in health service utilisation may contribute to the observed ethnic differences in  
31  
32  
33 251 CVD risk among breast cancer patients. Evidence on health care utilization among breast cancer  
34  
35 252 patients is scarce, but previous evidence of the general population in the Netherlands suggests  
36  
37 253 that some ethnic minority populations use more general practitioner care than Dutch people do,  
38  
39 254 but that they are less likely to use specialised care [26]. Moreover, ethnic differences in use of  
40  
41  
42 255 cardiac rehabilitation and lower adherence to medication therapy have been shown [27–30]. A  
43  
44 256 Danish study found that immigrants from Pakistan and Turkey did not receive adequate medical  
45  
46 257 treatment with beta-blockers after a first AMI compared with Danish-born residents [28]. In  
47  
48 258 addition, in the Netherlands, Surinamese people have been found to have poor blood pressure  
49  
50 259 control compared with their Dutch counterparts [30].  
51

52  
53 260 The relatively high incidence of CVD admission and mortality among Turkish and Surinamese  
54  
55 261 breast cancer women may be explained by the high prevalence of cardiovascular risk factors in  
56  
57  
58  
59  
60

1  
2  
3 262 these populations. The current study lacked information on CVD risk factor and we were  
4  
5 263 therefore not able to address the possible contribution of these to the observed ethnic differences.  
6  
7 264 However, previous studies of Surinamese and Turkish populations in the Netherlands showed  
8  
9 265 that hypertension, diabetes mellitus and obesity are more common among these populations  
10  
11 266 compared with the Dutch general population [30–33]. As an example, a previous Dutch study  
12  
13 267 showed that the prevalence of hypertension, the leading risk factor for CVD worldwide, was  
14  
15 268 higher in both Turkish and Surinamese people than in Dutch people [30]. A previous study found  
16  
17 269 that Antillean women have higher risk of certain CVD risk factors than Dutch women [34].  
18  
19 270 Further, since Antilleans resemble other ethnic groups who have been found to have higher risk  
20  
21 271 of some CVD risk factors, such as Surinamese women with African background, this might be  
22  
23 272 the case for Antillean women as well and suggests the need for further study among this  
24  
25 273 population in the Netherlands. In addition, a study from the US, found that African American  
26  
27 274 breast cancer patients have higher prevalence of certain CVD risk factors, such as hypertension,  
28  
29 275 diabetes and obesity, prior to initiating aromatase inhibitory therapy, compared with White  
30  
31 276 American breast cancer patients of the same age [35]. Although the ethnic groups are not directly  
32  
33 277 comparable, this may also be the case for some of the ethnic groups in the current study, such as  
34  
35 278 the African Surinamese and Antillean women. Evidence suggests that the presence of CVD risk  
36  
37 279 factors among breast cancer patients at diagnosis is a strong predictive factor for the development  
38  
39 280 of cardiovascular damage associated with breast cancer therapy [36]. The higher risk factor  
40  
41 281 burden in some ethnic minority groups may therefore contribute to the higher incidence of CVD  
42  
43 282 in these groups.  
44  
45  
46  
47  
48  
49

50  
51 283 Additionally, since the risk of CVD has been shown to vary according to breast cancer therapy  
52  
53 284 [9,37], the observed differences may be explained by variation in the treatment received by  
54  
55 285 different ethnic groups. In the current study, data on treatment was not available. However,  
56  
57  
58  
59  
60



1  
2  
3 286 studies from the US and UK have reported that ethnic minority women were more likely to  
4  
5 287 receive chemotherapy, which was largely explained by more advanced stage and higher grade  
6  
7 288 tumours [38,39].  
8  
9

10 289  
11  
12 290 Our findings have important clinical and public health implications because identifying breast  
13  
14 291 cancer patients who are most vulnerable to cardiovascular outcomes is important in order to  
15  
16 292 guide strategies among breast cancer patients. The findings suggest the need to increase attention  
17  
18 293 for these women in the cardiovascular risk factor management guidelines in the Netherlands and  
19  
20 294 awareness of the observed ethnic differences in the risk of cardiovascular outcomes among breast  
21  
22 295 cancer patients should be raised among clinicians and incorporated into oncology practices. The  
23  
24 296 observed differences suggest the need for further studies to identify factors explaining these  
25  
26 297 differences. More specific, studies addressing the potential contribution of both CVD risk factors  
27  
28 298 and type of treatment to the observed ethnic differences found in this study are needed. This will  
29  
30 299 help to tailor appropriate public health and clinical interventions to improve outcomes among  
31  
32 300 breast cancer patients most at risk of adverse CVD outcomes.  
33  
34  
35  
36  
37  
38  
39

40 302 *Strength and limitations:*

41  
42 303 The strength of the current study is the validity of the registries, the linkage methods, and the lack  
43  
44 304 of selection of the cohorts. A high validity of both the Dutch National Hospital Discharge  
45  
46 305 Register and the Dutch Population Register has been demonstrated. In a random sample of the  
47  
48 306 Hospital Discharge Register, 99% of the personal, admission and discharge data and 84% of the  
49  
50 307 principal diagnoses (validated through medical record review by medical specialists) were  
51  
52 308 correctly registered [40]. In addition, over 97% of the uniquely linked hospital admissions  
53  
54  
55  
56  
57  
58  
59

1  
2  
3 309 resulting from linkage of the Hospital Discharge Register with the Population Register were  
4  
5 310 shown to be correctly linked [41].  
6

7 311 Nonetheless, some limitations must be considered. First, although the study is based on a  
8  
9 312 nationwide cohort of breast cancer patients, absolute numbers are somewhat small when divided  
10  
11 313 into different ethnic groups. Consequently, the numbers were too small to investigate different  
12  
13 314 kinds of CVD, which could have afforded a more nuanced picture. Second, inherent to many  
14  
15 315 national-level databases, we lack detailed data on CVD risk factors, such as smoking, alcohol,  
16  
17 316 cholesterol and obesity, and therefore we were unable to do additional analyses to assess the  
18  
19 317 contribution of these to the observed ethnic differences. However, we were able to shed light on  
20  
21 318 the potential contributing risk factors to the observed differences due to previous studies on  
22  
23 319 ethnic differences in risk factors in the Netherlands [30–33]. Additionally, the study lack data on  
24  
25 320 treatment of breast cancer. Since, CVD risk has been shown to vary according to type of  
26  
27 321 treatment [9,37], adjustment for treatment would have been preferable in order to assess the  
28  
29 322 potential impact of differences in treatment to the observed ethnic differences in CVD. Finally, as  
30  
31 323 in numerous studies, the classifications of the various ethnic groups were based on country of  
32  
33 324 birth. Country of birth may reflect ethnicity reasonably well among some ethnic groups but is  
34  
35 325 likely to be an unreliable proxy measure of ethnicity for other groups such as Surinamese [17].  
36  
37 326 The results may be generalised to other European settings with similar health care services and  
38  
39 327 composition of ethnic groups.  
40  
41  
42  
43  
44  
45  
46  
47  
48

## 49 329 **5. Conclusion**

50  
51 330 The results of the current study suggest that the risk of CVD related outcomes among breast  
52  
53 331 cancer patients vary by ethnicity. Surinamese and Turkey breast cancer patients experienced a  
54  
55 332 higher risk, whereas Indonesian patients had a slightly lower risk of CVD event compared with  
56  
57  
58  
59  
60

1  
2  
3 333 their Dutch counterparts. More extensive cohort studies are needed to identify the forms of CVD  
4  
5 334 that are most common in these groups as well as the potential factors contributing to these  
6  
7  
8 335 differences.

9  
10 336

11  
12 337 **Competing interest:** None declared.

13  
14 338 **Funding**

15  
16  
17 339 This work was supported by the Dutch Heart Foundation (grant number 2010B296).

18  
19 340

20  
21 341 **Contributor ship statement**

22  
23 342 LD, JB, IV, MLB, MN, CA were involved in the study design. LD and CA wrote the paper. JB  
24  
25 343 analysed the data. JB, IV, MLB and MN critically revised the manuscript. All Authors approved  
26  
27  
28 344 the final version of the manuscript.

29  
30 345

31  
32 346 **Data sharing statement**

33  
34 347 No additional data are available.

35  
36 348

37  
38 349

39  
40 350

41  
42 351

43  
44 352

45  
46 353

47  
48 354

49  
50 355

51  
52 356

357 **References**

- 358 [1] C. Allemani, H.K. Weir, H. Carreira, R. Harewood, D. Spika, X.S. Wang, F. Bannon, J. V.  
359 Ahn, C.J. Johnson, A. Bonaventure, R. Marcos-Gragera, C. Stiller, G. Azevedo E Silva,  
360 W.Q. Chen, O.J. Ogunbiyi, B. Rachet, M.J. Soeberg, H. You, T. Matsuda, M. Bielska-  
361 Lasota, H. Storm, T.C. Tucker, M.P. Coleman, Global surveillance of cancer survival  
362 1995-2009: Analysis of individual data for 25 676 887 patients from 279 population-based  
363 registries in 67 countries (CONCORD-2), *Lancet*. 385 (2015) 977–1010.
- 364 [2] S.H. Armenian, L. Xu, B. Ky, C. Sun, L.T. Farol, S.K. Pal, P.S. Douglas, S. Bhatia, C.  
365 Chao, Cardiovascular disease among survivors of adult-onset cancer: A community-based  
366 retrospective cohort study, *J. Clin. Oncol.* 34 (2016) 1122–1130.
- 367 [3] P.T. Bradshaw, J. Stevens, N. Khankari, S.L. Teitelbaum, A.I. Neugut, M.D. Gammon,  
368 Cardiovascular Disease Mortality Among Breast Cancer Survivors, *Epidemiology*. 27  
369 (2016) 6–13.
- 370 [4] A. Berkman, B. F. Cole, P.A. Ades, S. Dickey, S.T. Higgins, A. Trentham-Dietz, B.L.  
371 Sprague, S.G. Lakoski, Racial differences in breast cancer, cardiovascular disease, and all-  
372 cause mortality among women with ductal carcinoma in situ of the breast, *Breast Cancer*  
373 *Res. Treat.* 148 (2014) 407–413.
- 374 [5] J.L. Patnaik, T. Byers, C. DiGuseppi, D. Dabelea, T.D. Denberg, Cardiovascular disease  
375 competes with breast cancer as the leading cause of death for older females diagnosed with  
376 breast cancer: a retrospective cohort study, *Breast Cancer Res.* 13 (2011) R64.
- 377 [6] D. Berry, K. Cronin, S. Plevritis, D. Fryback, L. Clarke, M. Zelen, J. Mandelblatt, A.  
378 Yakovlev, D. Habbema, E. Feuer, Effect of screening and adjuvant therapy on mortality  
379 from breast cancer, *N. Engl. J. Med.* 353 (2005) 1784–92.  
380 <http://www.nejm.org/doi/full/10.1056/nejmoa050518>.

- 1  
2  
3 381 [7] E.R. Myers, P. Moorman, J.M. Gierisch, L.J. Havrilesky, L.J. Grimm, S. Ghate, B.  
4  
5 382 Davidson, R.C. Montgomery, M.J. Crowley, D.C. McCrory, A. Kendrick, G.D. Sanders,  
6  
7 383 Benefits and harms of breast cancer screening: A systematic review, *JAMA - J. Am. Med.*  
8  
9 384 *Assoc.* 314 (2015) 1615–1634. doi:10.1001/jama.2015.13183.  
10  
11  
12 385 [8] S.C. Darby, M. Ewertz, P. McGale, A.M. Bennet, U. Blom-Goldman, D. Brønnum, C.  
13  
14 386 Correa, D. Cutter, G. Gagliardi, B. Gigante, M.-B. Jensen, A. Nisbet, R. Peto, K. Rahimi,  
15  
16 387 C. Taylor, P. Hall, Risk of ischemic heart disease in women after radiotherapy for breast  
17  
18 388 cancer., *N. Engl. J. Med.* 368 (2013) 987–98.  
19  
20  
21 389 [9] P. Thavendiranathan, H. Abdel-Qadir, H.D. Fischer, X. Camacho, E. Amir, P.C. Austin,  
22  
23 390 D.S. Lee, Breast Cancer Therapy-Related Cardiac Dysfunction in Adult Women Treated in  
24  
25 391 Routine Clinical Practice: A Population-Based Cohort Study., *J. Clin. Oncol.* 34 (2016)  
26  
27 392 *JCO.*2015.65.1505-.  
28  
29  
30 393 [10] K.E. Weaver, R.E. Foraker, C.M. Alfano, J.H. Rowland, N.K. Arora, K.M. Bellizzi, A.S.  
31  
32 394 Hamilton, I. Oakley-Girvan, G. Keel, N.M. Aziz, Cardiovascular risk factors among long-  
33  
34 395 term survivors of breast, prostate, colorectal, and gynecologic cancers: A gap in  
35  
36 396 survivorship care?, *J. Cancer Surviv.* 7 (2013) 253–261.  
37  
38  
39 397 [11] H. Møller, K. Henson, M. Lichtenborg, J. Broggio, J. Charman, V.H. Coupland, E.  
40  
41 398 Davies, R.H. Jack, R. Sullivan, P. Vedsted, K. Horgan, N. Pearce, A. Purushotham, Short-  
42  
43 399 term breast cancer survival in relation to ethnicity, stage, grade and receptor status:  
44  
45 400 national cohort study in England, *Br. J. Cancer.* (2016) 1–8.  
46  
47  
48 401 [12] F. Latif, J. Helgeland, G. Bukholm, I.R.K. Bukholm, Ethnicity differences in breast cancer  
49  
50 402 stage at the time of diagnosis in Norway, *Scand. J. Surg.* 104 (2015) 248–253.  
51  
52  
53 403 [13] A.A.M. Van Oeffelen, I. Vaartjes, K. Stronks, M.L. Bots, C. Agyemang, Incidence of  
54  
55 404 acute myocardial infarction in first and second generation minority groups: Does the  
56  
57  
58  
59  
60

- 1  
2  
3 405 second generation converge towards the majority population?, *Int. J. Cardiol.* 168 (2013)  
4  
5 406 5422–5429.  
6  
7  
8 407 [14] R.S. Bhopal, N. Bansal, C.M. Fischbacher, H. Brown, S. Capewell, Ethnic variations in  
9  
10 408 heart failure: Scottish Health and Ethnicity Linkage Study (SHELs)., *Heart.* 98 (2012)  
11  
12 409 468–73.  
13  
14  
15 410 [15] P.A. Solanki, N.Y. Ko, D.M. Qato, G.S. Calip, Risk of cancer-specific, cardiovascular, and  
16  
17 411 all-cause mortality among Asian and Pacific Islander breast cancer survivors in the United  
18  
19 412 States, 1991-2011., *Springerplus.* 5 (2016) 82.  
20  
21  
22 413 [16] H.L. Koek, A. de Bruin, A. Gast, E. Gevers, J.W.P.F. Kardaun, J.B. Reistma, D.E.  
23  
24 414 Grobbee, M.L. Bots, Incidence of first acute myocardial infarction in the Netherlands, *Neth.*  
25  
26 415 *J. Med.* 65 (2007) 434–441.  
27  
28  
29 416 [17] K. Stronks, I. Kulu-Glasgow, C. Agyemang, The utility of “country of birth” for the  
30  
31 417 classification of ethnic groups in health research: the Dutch experience., *Ethn. Health.* 14  
32  
33 418 (2009) 255–269.  
34  
35  
36 419 [18] M. Arnold, M.J. Aarts, S. Siesling, M. Van Der Aa, O. Visser, J.W. Coebergh, Diverging  
37  
38 420 breast and stomach cancer incidence and survival in migrants in The Netherlands, 1996-  
39  
40 421 2009., *Acta Oncol.* 52 (2013) 1195–1201.  
41  
42  
43 422 [19] T. Gathani, R. Ali, A. Balkwill, J. Green, G. Reeves, V. Beral, K.A. Moser, Million  
44  
45 423 Women Study Collaborators, Ethnic differences in breast cancer incidence in England are  
46  
47 424 due to differences in known risk factors for the disease: prospective study., *Br. J. Cancer.*  
48  
49 425 110 (2014) 224–9.  
50  
51  
52 426 [20] N.F. Hempler, F.B. Larsen, S.S. Nielsen, F. Diderichsen, A.H. Andreasen, T. Jørgensen, A  
53  
54 427 registry-based follow-up study, comparing the incidence of cardiovascular disease in  
55  
56 428 native Danes and immigrants born in Turkey, Pakistan and the former Yugoslavia: do

- 1  
2  
3 429 social inequalities play a role?, *BMC Public Health*. 11 (2011) 662.  
4  
5 430 [21] E. Copson, T. Maishman, S. Gerty, B. Eccles, L. Stanton, R.I. Cutress, D.G. Altman, L.  
6  
7 431 Durcan, P. Simmonds, L. Jones, W. Tapper, D. Eccles, Ethnicity and outcome of young  
8  
9 432 breast cancer patients in the United Kingdom: the POSH study., *Br. J. Cancer*. 110 (2014)  
10  
11 433 230–41.  
12  
13  
14 434 [22] A.A.M. Van Oeffelen, C. Agyemang, K. Stronks, M.L. Bots, I. Vaartjes, Incidence of first  
15  
16 435 acute myocardial infarction over time specific for age , sex , and country of birth, (2014)  
17  
18 436 20–27.  
19  
20  
21 437 [23] C. Agyemang, A.A.M. Van Oeffelen, M. Norredam, L.J. Kappelle, C.J.M. Klijn, M.L.  
22  
23 438 Bots, K. Stronks, I. Vaartjes, Ethnic disparities in ischemic stroke, intracerebral  
24  
25 439 hemorrhage, and subarachnoid hemorrhage incidence in the Netherlands, *Stroke*. 45 (2014)  
26  
27 440 3236–3242.  
28  
29  
30 441 [24] C. Agyemang, I. Vaartjes, M.L. Bots, I.G. van Valkengoed, J.S. de Munter, A. de Bruin,  
31  
32 442 M. Berger-van Sijl, J.B. Reitsma, K. Stronks, Risk of death after first admission for  
33  
34 443 cardiovascular diseases by country of birth in The Netherlands: a nationwide record-linked  
35  
36 444 retrospective cohort study., *Heart*. 95 (2009) 747–753.  
37  
38  
39 445 [25] L. Ho, V. Bos, A.E. Kunst, Differences in cause-of-death patterns between the native  
40  
41 446 Dutch and persons of Indonesian descent in the Netherlands, *Am. J. Public Health*. 97  
42  
43 447 (2007) 1616–1618.  
44  
45  
46 448 [26] K. Stronks, a C. Ravelli, S. a Reijneveld, Immigrants in the Netherlands: equal access for  
47  
48 449 equal needs?, *J. Epidemiol. Community Health*. 55 (2001) 701–707.  
49  
50  
51 450 [27] O. Cortes, H.M. Arthur, Determinants of referral to cardiac rehabilitation programs in  
52  
53 451 patients with coronary artery disease: A systematic review, *Am. Heart J*. 151 (2006) 249–  
54  
55 452 256.  
56  
57  
58  
59  
60

- 1  
2  
3 453 [28] N.F. Hempler, F. Diderichsen, F.B. Larsen, S. Ladelund, T. Jørgensen, Do immigrants  
4  
5 454 from Turkey, Pakistan and Yugoslavia receive adequate medical treatment with beta-  
6  
7 455 blockers and statins after acute myocardial infarction compared with Danish-born  
8  
9 456 residents? A register-based follow-up study, *Eur. J. Clin. Pharmacol.* 66 (2010) 735–742.  
10  
11  
12 457 [29] G. Feder, A.M. Crook, P. Magee, S. Banerjee, A.D. Timmis, H. Hemingway, Ethnic  
13  
14 458 differences in invasive management of coronary disease: Prospective cohort study of  
15  
16 459 patients undergoing angiography, *BMJ Br. Med. J.* 324 (2002) 511–516.  
17  
18  
19 460 [30] C. Agyemang, S. Kieft, M.B. Snijder, E.J. Beune, B.J. Van Den Born, L.M. Brewster, J.J.  
20  
21 461 Ujcic-Voortman, N. Bindraban, G. Van Montfrans, R.J. Peters, K. Stronks, Hypertension  
22  
23 462 control in a large multi-ethnic cohort in Amsterdam, The Netherlands: The HELIUS study,  
24  
25 463 *Int. J. Cardiol.* 183 (2015) 180–189.  
26  
27  
28 464 [31] J.K. Ujcic-Voortman, M.T. Schram, M.A. Jacobs-Van Der Bruggen, A.P. Verhoeff, C.A.  
29  
30 465 Baan, Diabetes prevalence and risk factors among ethnic minorities, *Eur. J. Public Health.*  
31  
32 466 19 (2009) 511–515.  
33  
34  
35 467 [32] N.R. Bindraban, I.G.M. van Valkengoed, G. Mairuhu, F. Holleman, J.B.L. Hoekstra,  
36  
37 468 B.P.J. Michels, R.P. Koopmans, K. Stronks, Prevalence of diabetes mellitus and the  
38  
39 469 performance of a risk score among Hindustani Surinamese, African Surinamese and ethnic  
40  
41 470 Dutch: a cross-sectional population-based study., *BMC Public Health.* 8 (2008) 271.  
42  
43  
44 471 [33] J.K. Ujcic-Voortman, G. Bos, C.A. Baan, A.P. Verhoeff, J.C. Seidell, Obesity and body fat  
45  
46 472 distribution: Ethnic differences and the role of socio-economic status, *Obes. Facts.* 4  
47  
48 473 (2011) 53–60.  
49  
50  
51 474 [34] F. El Fakiri, M.A. Bruijnzeels, M.M.E. Foets, A.W. Hoes, Different distribution of  
52  
53 475 cardiovascular risk factors according to ethnicity: A study in a high risk population, *J.*  
54  
55 476 *Immigr. Minor. Heal.* 10 (2008) 559–565. doi:10.1007/s10903-008-9144-4.



- 1  
2  
3 477 [35] L. Gallicchio, C. Calhoun, K. Helzlsouer, Cardiovascular Health among Black and White  
4  
5 478 Breast Cancer Patients Initiating Aromatase Inhibitor Therapy, *Clin. Breast Cancer*. 16  
6  
7 479 (2016) e23–e31.
- 8  
9  
10 480 [36] N. Maurea, C. Coppola, G. Ragone, G. Frasci, A. Bonelli, C. Romano, R.V. Iaffaioli,  
11  
12 481 Women survive breast cancer but fall victim to heart failure: the shadows and lights of  
13  
14 482 targeted therapy., *J. Cardiovasc. Med. (Hagerstown)*. 11 (2010) 861–868.
- 15  
16  
17 483 [37] E.J. Bowles, R. Wellman, H.S. Feigelson, A.A. Onitilo, A.N. Freedman, T. Delate, L.A.  
18  
19 484 Allen, L. Nekhlyudov, K.A. Goddard, R.L. Davis, L.A. Habel, M.U. Yood, C. McCarty,  
20  
21 485 D.J. Magid, E.H. Wagner, P.S. Team, Risk of heart failure in breast cancer patients after  
22  
23 486 anthracycline and trastuzumab treatment: a retrospective cohort study, *J. Natl. Cancer Inst.*  
24  
25 487 104 (2012) 1293–1305.
- 26  
27  
28 488 [38] R.H. Jack, E.A. Davies, H. Møller, Breast cancer incidence , stage , treatment and survival  
29  
30 489 in ethnic groups in South East England, (2009) 545–550.
- 31  
32  
33 490 [39] B.K. Killelea, V.Q. Yang, S. Wang, B. Hayse, S. Mougalian, N.R. Horowitz, A.B.  
34  
35 491 Chagpar, L. Pusztai, D.R. Lannin, N.R. Horowitz, B. Anees, Racial Differences in the Use  
36  
37 492 and Outcome of Neoadjuvant Chemotherapy for Breast Cancer : Results From the National  
38  
39 493 Cancer Data Base, 33 (2017) 4267–4276.
- 40  
41  
42 494 [40] G. Paas, K. Veenhuizen, Research on the validity of the LMR (in Dutch), *Prismant*.  
43  
44 495 (2002).
- 45  
46  
47 496 [41] A. De Bruin, J. Kardaun, F. Gast, E. De Bruin, M. Van Sijl, G. Verweij, Record linkage of  
48  
49 497 hospital discharge register with population register : Experiences at Statistics Netherlands,  
50  
51 498 *Stat. Bruin A De, Kardaun J, Gast F, Bruin E De, Sijl M Van, Verweij G. Rec. Link. Hosp.*  
52  
53 499 *Disch. Regist. with Popul. Regist. Exp. Stat. Netherlands. Stat. (Ber)*. 2004;2123–32. S.  
54  
55 500 21 (2004) 23–32.

501 **Table 1** Demographic and disease characteristics of women admitted for breast cancer between  
 502 1996 and 2010 in the Netherlands according to ethnic group

|                                              | <b>Ethnic Dutch</b><br>N % | <b>Antillean</b><br>N % | <b>Indonesian</b><br>N % | <b>Moroccan</b><br>N % | <b>Surinamese</b><br>N % | <b>Turkish</b><br>N % |
|----------------------------------------------|----------------------------|-------------------------|--------------------------|------------------------|--------------------------|-----------------------|
| <b>No. of patients</b>                       | 120,809 (100)              | 454 (100)               | 3,457 (100)              | 919 (100)              | 1,351 (100)              | 724 (100)             |
| <b>Mean age at diagnosis (y), sd</b>         | 60.4 (13.3)                | 52.8 (11.8)             | 57.0 (13.1)              | 47.0 (10.7)            | 52.8 (12.7)              | 49.5 (11.4)           |
| <b>Attained age (y) end of follow-up</b>     |                            |                         |                          |                        |                          |                       |
| ≤ 44                                         | 5,029 (4.2)                | 53 (11.7)               | 206 (6.0)                | 230 (25.0)             | 172 (12.7)               | 125 (17.3)            |
| 45-59                                        | 31,731 (26.3)              | 197 (43.4)              | 1,262 (36.5)             | 476 (51.8)             | 582 (43.1)               | 336 (46.4)            |
| 60-74                                        | 46,671 (38.6)              | 169 (37.2)              | 1,199 (34.7)             | 185 (20.1)             | 421 (31.2)               | 225 (31.1)            |
| ≥ 75                                         | 37,378 (30.9)              | 35 (7.7)                | 790 (22.9)               | 28 (3.0)               | 176 (13.0)               | 38 (5.2)              |
| <b>Follow-up time (y), median (IQR)</b>      | 4.5 (6.5)                  | 3.6 (5.8)               | 4.6 (5.5)                | 3.6 (6.0)              | 3.8 (??)                 | 4.0 (6.0)             |
| <b>Breast cancer diagnosis</b>               |                            |                         |                          |                        |                          |                       |
| In situ                                      | 9,774 (8.1)                | 45 (9.9)                | 336 (9.7)                | 91 (9.9)               | 131 (9.7)                | 62 (8.6)              |
| Invasive                                     | 111,035 (91.9)             | 409 (90.1)              | 3,121 (90.3)             | 828 (90.1).1           | 1,220 (90.3)             | 662 (91.4)            |
| <b>Period of breast cancer diagnosis (y)</b> |                            |                         |                          |                        |                          |                       |
| 1996-1999                                    | 28,869 (23.9)              | 66 (14.5)               | 743 (21.5)               | 115 (12.5)             | 230 (17.0)               | 104 (14.4)            |
| 2000-2003                                    | 32,196 (26.7)              | 121 (26.7)              | 912 (26.4)               | 201 (21.9)             | 326 (24.1)               | 187 (25.8)            |
| 2004-2007                                    | 33,385 (27.6)              | 139 (30.6)              | 990 (28.6)               | 289 (31.4)             | 420 (31.1)               | 222 (30.7)            |
| 2008-2010                                    | 26,359 (21.8)              | 128 (28.2)              | 812 (23.5)               | 314 (34.2)             | 375 (27.8)               | 211 (29.1)            |
| <b>Marital status</b>                        |                            |                         |                          |                        |                          |                       |
| Single/ widowed/ divorced                    | 53,860 (44.6)              | 268 (59.0)              | 1,701 (49.2)             | 301 (32.8)             | 820 (60.7)               | 277 (38.3)            |
| Living with partner/ married                 | 66,949 (55.4)              | 186 (41.0)              | 1,756 (50.8)             | 618 (67.2)             | 531 (39.3)               | 447 (61.7)            |
| <b>Hospital admissions</b>                   |                            |                         |                          |                        |                          |                       |
| CVD                                          | 23,431 (19.4)              | 68 (15.0)               | 515 (14.9)               | 85 (9.2)               | 259 (19.2)               | 101 (14.0)            |
| - Heart failure                              | 3,426 (2.8)                | 11 (2.4)                | 66 (1.9)                 | 13 (1.4)               | 30 (2.2)                 | 16 (2.2)              |
| - Myocardial infarction                      | 1,482 (1.2)                | <10 <sup>a</sup>        | 25 (0.7)                 | <10 <sup>a</sup>       | <10 <sup>a</sup>         | <10 <sup>a</sup>      |
| - Cerebrovascular disease                    | 3,529 (2.9)                | <10 <sup>a</sup>        | 82 (2.4)                 | <10 <sup>a</sup>       | 34 (2.5)                 | <10 <sup>a</sup>      |
| <b>Death during follow-up</b>                |                            |                         |                          |                        |                          |                       |
| Total deaths                                 | 29,966 (24.8)              | 101 (22.2)              | 665 (19.2)               | 124 (13.5)             | 251 (18.6)               | 96 (13.3)             |
| Breast cancer cause                          | 12,279 (10.2)              | 64 (14.1)               | 301 (8.7)                | 82 (8.9)               | 136 (10.1)               | 51 (7.0)              |
| Cardiovascular cause                         | 7,438 (6.2)                | <10 <sup>a</sup>        | 158 (4.6)                | 11 (1.2)               | 50 (3.7)                 | 21 (2.9)              |
| Other causes                                 | 10,249 (8.5)               | <10                     | 206 (6.0)                | 31 (3.4)               | 65 (4.8)                 | 24 (3.3)              |

Abbreviations: CVD = cardiovascular disease, IQR = Interquartile range, y = years

<sup>a</sup> = Not given in line with the Dutch data protection guideline as the number of cases was less than 10

503

504

505 **Table 2** Unadjusted and adjusted hazard ratios (95% CI) for a cardiovascular event by ethnic  
506 group

|                     | <b>Unadjusted<br/>HR (95% CI)</b> | <b>Adjusted<br/>HR (95% CI)</b> |
|---------------------|-----------------------------------|---------------------------------|
| <b>Ethnic group</b> |                                   |                                 |
| Dutch               | 1.00 (Ref.)                       | 1.00 (Ref.)                     |
| Surinamese          | 1.03 (0.92-1.16)                  | 1.46 (1.29-1.64)                |
| Moroccans           | 0.51 (0.42-0.63)                  | 1.01 (0.83-1.24)                |
| Turkish             | 0.71 (0.59-0.86)                  | 1.25 (1.03-1.51)                |
| Antilleans          | 0.83 (0.66-1.04)                  | 1.24 (0.98-1.56)                |
| Indonesians         | 0.76 (0.70-0.82)                  | 0.88 (0.81-0.96)                |

507 Adjusted for age, year of admission and type of breast cancer

508  
509  
510  
511 **Table 3** Unadjusted and adjusted hazard ratios [95% confidence interval] for a cardiovascular  
512 admission by ethnic group

|                     | <b>Unadjusted<br/>HR (95% CI)</b> | <b>Adjusted<br/>HR (95% CI)</b> |
|---------------------|-----------------------------------|---------------------------------|
| <b>Ethnic group</b> |                                   |                                 |
| Dutch               | 1.00 (Ref.)                       | 1.00 (Ref.)                     |
| Surinamese          | 1.09 (0.96-1.23)                  | 1.45 (1.28-1.64)                |
| Moroccans           | 0.53 (0.43-0.66)                  | 0.92 (0.75 -1.14)               |
| Turkish             | 0.76 (0.63-0.93)                  | 1.21(0.99-1.47)                 |
| Antilleans          | 0.89 (0.70-1.13)                  | 1.24 (0.98-1.57)                |
| Indonesians         | 0.75 (0.69-0.82)                  | 0.85 (0.78-0.93)                |

513 Adjusted for age, year of admission and type of breast cancer

514  
515  
516  
517 **Table 4** Unadjusted and adjusted hazard ratios for cardiovascular mortality by ethnic group

|                     | <b>Unadjusted<br/>HR (95% CI)</b> | <b>Adjusted<br/>HR (95% CI)</b> |
|---------------------|-----------------------------------|---------------------------------|
| <b>Ethnic group</b> |                                   |                                 |
| Dutch               | 1.00 (Ref.)                       | 1.00 (Ref.)                     |
| Surinamese          | 0.70 (0.53-0.93)                  | 1.49 (1.13-1.97)                |
| Turkish             | 0.55 (0.36-0.84)                  | 1.96 (1.27-3.01)                |
| Indonesians         | 0.76 (0.65-0.89)                  | 0.99 (0.84-1.16)                |

518 Adjusted for age, year of admission and type of breast cancer

519 The number of cardiovascular mortality for the Antilleans and Moroccan women were too low.

**STROBE 2007 (v4) checklist of items to be included in reports of observational studies in epidemiology\***  
**Checklist for cohort, case-control, and cross-sectional studies (combined)**

| Section/Topic             | Item # | Recommendation                                                                                                                                                                                                                                                                                                                                                                                                                                                         | Reported on page # |
|---------------------------|--------|------------------------------------------------------------------------------------------------------------------------------------------------------------------------------------------------------------------------------------------------------------------------------------------------------------------------------------------------------------------------------------------------------------------------------------------------------------------------|--------------------|
| Title and abstract        | 1      | (a) Indicate the study's design with a commonly used term in the title or the abstract                                                                                                                                                                                                                                                                                                                                                                                 | 1 and 2            |
|                           |        | (b) Provide in the abstract an informative and balanced summary of what was done and what was found                                                                                                                                                                                                                                                                                                                                                                    | 2                  |
| <b>Introduction</b>       |        |                                                                                                                                                                                                                                                                                                                                                                                                                                                                        |                    |
| Background/rationale      | 2      | Explain the scientific background and rationale for the investigation being reported                                                                                                                                                                                                                                                                                                                                                                                   | 4                  |
| Objectives                | 3      | State specific objectives, including any pre-specified hypotheses                                                                                                                                                                                                                                                                                                                                                                                                      | 5                  |
| <b>Methods</b>            |        |                                                                                                                                                                                                                                                                                                                                                                                                                                                                        |                    |
| Study design              | 4      | Present key elements of study design early in the paper                                                                                                                                                                                                                                                                                                                                                                                                                | 5                  |
| Setting                   | 5      | Describe the setting, locations, and relevant dates, including periods of recruitment, exposure, follow-up, and data collection                                                                                                                                                                                                                                                                                                                                        | 5                  |
| Participants              | 6      | (a) <i>Cohort study</i> —Give the eligibility criteria, and the sources and methods of selection of participants. Describe methods of follow-up<br><i>Case-control study</i> —Give the eligibility criteria, and the sources and methods of case ascertainment and control selection. Give the rationale for the choice of cases and controls<br><i>Cross-sectional study</i> —Give the eligibility criteria, and the sources and methods of selection of participants | 5                  |
|                           |        | (b) <i>Cohort study</i> —For matched studies, give matching criteria and number of exposed and unexposed<br><i>Case-control study</i> —For matched studies, give matching criteria and the number of controls per case                                                                                                                                                                                                                                                 |                    |
| Variables                 | 7      | Clearly define all outcomes, exposures, predictors, potential confounders, and effect modifiers. Give diagnostic criteria, if applicable                                                                                                                                                                                                                                                                                                                               | 6                  |
| Data sources/ measurement | 8*     | For each variable of interest, give sources of data and details of methods of assessment (measurement). Describe comparability of assessment methods if there is more than one group                                                                                                                                                                                                                                                                                   | 5 and 6            |
| Bias                      | 9      | Describe any efforts to address potential sources of bias                                                                                                                                                                                                                                                                                                                                                                                                              | 6 and 7            |
| Study size                | 10     | Explain how the study size was arrived at                                                                                                                                                                                                                                                                                                                                                                                                                              | 7                  |
| Quantitative variables    | 11     | Explain how quantitative variables were handled in the analyses. If applicable, describe which groupings were chosen and why                                                                                                                                                                                                                                                                                                                                           | 6                  |
| Statistical methods       | 12     | (a) Describe all statistical methods, including those used to control for confounding                                                                                                                                                                                                                                                                                                                                                                                  | 6 and 7            |
|                           |        | (b) Describe any methods used to examine subgroups and interactions                                                                                                                                                                                                                                                                                                                                                                                                    | -                  |
|                           |        | (c) Explain how missing data were addressed                                                                                                                                                                                                                                                                                                                                                                                                                            | -                  |
|                           |        | (d) <i>Cohort study</i> —If applicable, explain how loss to follow-up was addressed<br><i>Case-control study</i> —If applicable, explain how matching of cases and controls was addressed                                                                                                                                                                                                                                                                              | -                  |

|                          |     |                                                                                                                                                                                                              |                            |
|--------------------------|-----|--------------------------------------------------------------------------------------------------------------------------------------------------------------------------------------------------------------|----------------------------|
|                          |     | <i>Cross-sectional study</i> —If applicable, describe analytical methods taking account of sampling strategy                                                                                                 |                            |
|                          |     | (e) Describe any sensitivity analyses                                                                                                                                                                        | -                          |
| <b>Results</b>           |     |                                                                                                                                                                                                              |                            |
| Participants             | 13* | (a) Report numbers of individuals at each stage of study—eg numbers potentially eligible, examined for eligibility, confirmed eligible, included in the study, completing follow-up, and analysed            | 7                          |
|                          |     | (b) Give reasons for non-participation at each stage                                                                                                                                                         | -                          |
|                          |     | (c) Consider use of a flow diagram                                                                                                                                                                           | -                          |
| Descriptive data         | 14* | (a) Give characteristics of study participants (eg demographic, clinical, social) and information on exposures and potential confounders                                                                     | 7 and 21 (table 1)         |
|                          |     | (b) Indicate number of participants with missing data for each variable of interest                                                                                                                          | -                          |
|                          |     | (c) <i>Cohort study</i> —Summarise follow-up time (eg, average and total amount)                                                                                                                             | 21 (table 1)               |
| Outcome data             | 15* | <i>Cohort study</i> —Report numbers of outcome events or summary measures over time                                                                                                                          | 7 and 21 (table 1)         |
|                          |     | <i>Case-control study</i> —Report numbers in each exposure category, or summary measures of exposure                                                                                                         |                            |
|                          |     | <i>Cross-sectional study</i> —Report numbers of outcome events or summary measures                                                                                                                           |                            |
| Main results             | 16  | (a) Give unadjusted estimates and, if applicable, confounder-adjusted estimates and their precision (eg, 95% confidence interval). Make clear which confounders were adjusted for and why they were included | 7,8, and 22 (table 2, 3,4) |
|                          |     | (b) Report category boundaries when continuous variables were categorized                                                                                                                                    | -                          |
|                          |     | (c) If relevant, consider translating estimates of relative risk into absolute risk for a meaningful time period                                                                                             | -                          |
| Other analyses           | 17  | Report other analyses done—eg analyses of subgroups and interactions, and sensitivity analyses                                                                                                               | -                          |
| <b>Discussion</b>        |     |                                                                                                                                                                                                              |                            |
| Key results              | 18  | Summarise key results with reference to study objectives                                                                                                                                                     | 8                          |
| Limitations              | 19  | Discuss limitations of the study, taking into account sources of potential bias or imprecision. Discuss both direction and magnitude of any potential bias                                                   | 12 - 13                    |
| Interpretation           | 20  | Give a cautious overall interpretation of results considering objectives, limitations, multiplicity of analyses, results from similar studies, and other relevant evidence                                   | 9-12                       |
| Generalisability         | 21  | Discuss the generalisability (external validity) of the study results                                                                                                                                        | 13                         |
| <b>Other information</b> |     |                                                                                                                                                                                                              |                            |
| Funding                  | 22  | Give the source of funding and the role of the funders for the present study and, if applicable, for the original study on which the present article is based                                                | 14                         |

\*Give information separately for cases and controls in case-control studies and, if applicable, for exposed and unexposed groups in cohort and cross-sectional studies.

1  
2  
3  
4 **Note:** An Explanation and Elaboration article discusses each checklist item and gives methodological background and published examples of transparent reporting. The STROBE  
5 checklist is best used in conjunction with this article (freely available on the Web sites of PLoS Medicine at <http://www.plosmedicine.org/>, Annals of Internal Medicine at  
6 <http://www.annals.org/>, and Epidemiology at <http://www.epidem.com/>). Information on the STROBE Initiative is available at [www.strobe-statement.org](http://www.strobe-statement.org).  
7  
8  
9  
10  
11  
12  
13  
14  
15  
16  
17  
18  
19  
20  
21  
22  
23  
24  
25  
26  
27  
28  
29  
30  
31  
32  
33  
34  
35  
36  
37  
38  
39  
40  
41  
42  
43  
44  
45  
46  
47

For peer review only

# BMJ Open

## Ethnic differences in cardiovascular morbidity and mortality among breast cancer patients in The Netherlands: a register-based cohort study.

|                                 |                                                                                                                                                                                                                                                                                                                                                                                                                                                                                                                                                                                                                                                                                                                                                                                                                                                                                                              |
|---------------------------------|--------------------------------------------------------------------------------------------------------------------------------------------------------------------------------------------------------------------------------------------------------------------------------------------------------------------------------------------------------------------------------------------------------------------------------------------------------------------------------------------------------------------------------------------------------------------------------------------------------------------------------------------------------------------------------------------------------------------------------------------------------------------------------------------------------------------------------------------------------------------------------------------------------------|
| Journal:                        | <i>BMJ Open</i>                                                                                                                                                                                                                                                                                                                                                                                                                                                                                                                                                                                                                                                                                                                                                                                                                                                                                              |
| Manuscript ID                   | bmjopen-2018-021509.R2                                                                                                                                                                                                                                                                                                                                                                                                                                                                                                                                                                                                                                                                                                                                                                                                                                                                                       |
| Article Type:                   | Research                                                                                                                                                                                                                                                                                                                                                                                                                                                                                                                                                                                                                                                                                                                                                                                                                                                                                                     |
| Date Submitted by the Author:   | 11-May-2018                                                                                                                                                                                                                                                                                                                                                                                                                                                                                                                                                                                                                                                                                                                                                                                                                                                                                                  |
| Complete List of Authors:       | Deen, Laura; University of Amsterdam, Department of Public Health, Academic Medical Centre; Copenhagen University Hospital, Section of Immigrant Medicine, Department of Infectious Diseases<br>Buddeke, Josefiën; University Medical Centre Utrecht, Julius Centre for Health Sciences and Primary Care<br>Vaartjes, Ilonca; University Medical Centre Utrecht, Julius Centre for Health Sciences and Primary Care<br>Bots, Michiel; University Medical Center Utrecht, Julius Centre for Health Sciences and Primary Care<br>Nørredam, Marie; University of Copenhagen, Danish Research Centre for Migration, Ethnicity and Health, Section of Health Services Research, Department of Public Health; Copenhagen University Hospital, Section of Immigrant Medicine, Department of Infectious Diseases<br>Agyemang, Charles; University of Amsterdam, Department of Public Health, Academic Medical Center |
| <b>Primary Subject Heading</b>: | Public health                                                                                                                                                                                                                                                                                                                                                                                                                                                                                                                                                                                                                                                                                                                                                                                                                                                                                                |
| Secondary Subject Heading:      | Epidemiology, Oncology, Cardiovascular medicine                                                                                                                                                                                                                                                                                                                                                                                                                                                                                                                                                                                                                                                                                                                                                                                                                                                              |
| Keywords:                       | Ethnicity, breast cancer, migrant, cardiovascular disease, cardiovascular mortality                                                                                                                                                                                                                                                                                                                                                                                                                                                                                                                                                                                                                                                                                                                                                                                                                          |
|                                 |                                                                                                                                                                                                                                                                                                                                                                                                                                                                                                                                                                                                                                                                                                                                                                                                                                                                                                              |

SCHOLARONE™  
Manuscripts

1  
2  
3 1 **Ethnic differences in cardiovascular morbidity and mortality among breast cancer patients**  
4  
5 2 **in The Netherlands: a register-based cohort study.**  
6  
7  
8 3

9  
10 4 Laura Deen, MSC<sup>1,2</sup>; Josefiën Buddeke, MSC<sup>3</sup>; Ilonca Vaartjes, PhD<sup>3</sup>; Michiel L. Bots, MD  
11  
12 5 PhD<sup>3</sup>; Marie Norredam, MD PhD<sup>2,4</sup>; Charles Agyemang, MPH, PhD<sup>1</sup>  
13

14 6 <sup>1</sup>*Department of Public Health, Academic Medical Centre, University of Amsterdam, Amsterdam*  
15  
16  
17 7 *Meibergdreef 9, 1105 AZ Amsterdam-Zuidoost, The Netherlands*  
18

19 8 <sup>2</sup>*Section of Immigrant Medicine, Department of Infectious Diseases, Copenhagen University*  
20  
21 9 *Hospital, Kettegård allé 30, 2650 Hvidovre, Denmark*  
22

23  
24 10 <sup>3</sup>*Julius Centre for Health Sciences and Primary Care, University Medical Centre Utrecht,*  
25  
26 11 *Heidelberglaan 100, 3584 CX Utrecht, The Netherlands*  
27

28 12 <sup>4</sup>*Danish Research Centre for Migration, Ethnicity and Health, Section of Health Services*  
29  
30 13 *Research, Department of Public Health, University of Copenhagen, Øster Farimagsgade 5, 1014*  
31  
32 14 *København K, Denmark*  
33  
34

35 15  
36  
37 16 Corresponding author:  
38  
39 17 Charles Agyemang, *Department of Public Health, Amsterdam Public Health Research Institute*  
40  
41 18 *Amsterdam UMC, University of Amsterdam, Meibergdreef 9, 1105 AZ, Amsterdam, The*  
42  
43 19 *Netherlands.*  
44  
45

46 20 e-mail: [c.o.agyemang@amc.uva.nl](mailto:c.o.agyemang@amc.uva.nl), telephone.: +31205664885  
47  
48

49 21  
50  
51 22 **Word count:**  
52

53 23 Abstract: 250.

54 24 Total manuscript (excluding references, tables and figures): 3221.  
55  
56  
57  
58  
59  
60



1  
2  
3 25  
45 26 **Abstract**

7 27 **Objectives:** Cardiovascular disease (CVD) is of increasing concern among breast cancer  
8 28 survivors. However, evidence on ethnic differences in CVD among women with breast cancer is  
9  
10 29 sparse. We assessed ethnic differences in cardiovascular morbidity and mortality among breast  
11  
12 30 cancer patients in The Netherlands.  
13  
14  
15  
16

17 31  
18  
19 32 **Methods:** A nationwide register-based cohort study comprising all women with a first admission  
20  
21 33 for breast cancer (n=127,714) between 1996 and 2010 in The Netherlands was conducted.  
22  
23 34 Differences in CVD admission, CVD mortality and overall CVD event, which comprised a CVD  
24  
25 35 admission and/or CVD mortality, between the largest ethnic minority groups (Surinamese,  
26  
27 36 Moroccan, Turkish, Antillean, and Indonesian) and the Dutch general population (henceforth,  
28  
29 37 Dutch) were investigated using Cox proportional hazard models.  
30  
31  
32

33 38  
34  
35 39 **Results:** The incidence of cardiovascular outcomes varied by ethnic group. The incidence of an  
36  
37 40 overall cardiovascular event was significantly higher for women with breast cancer from  
38  
39 41 Suriname (HR=1.46;95% CI 1.29–1.64) and Turkey (HR=1.25;95% CI 1.03–1.51), compared  
40  
41 42 with Dutch women with breast cancer. In contrast, Indonesian women with breast cancer had a  
42  
43 43 significantly lower risk (HR=0.88; 95% CI 0.81–0.96) of a cardiovascular event compared with  
44  
45 44 Dutch women with breast cancer. The risk of a cardiovascular event did not differ between  
46  
47 45 Moroccan and Dutch women with breast cancer, whereas for Antillean women the risk was not  
48  
49 46 significantly higher.  
50  
51  
52

53  
54 47  
55  
56  
57  
58  
59  
60

1  
2  
3 48 **Conclusions:** Our findings suggest that Surinamese and Turkish women with breast cancer are  
4  
5 49 disadvantaged in terms of cardiovascular outcomes compared with Dutch women with breast  
6  
7 50 cancer. More work is needed to unravel the potential factors contributing to these differences.  
8  
9  
10 51

11  
12 52 **Strengths and limitations of this study:**

- 13 53 • The study builds on data from nationwide registries which resulted in a large sample size.  
14  
15  
16 54 • The validity of the linkage of the included registries has proved to be high.  
17  
18 55 • Although the study is based on a nationwide cohort of breast cancer patients, absolute  
19  
20 56 numbers are somewhat small when divided into different ethnic groups.  
21  
22  
23 57 • Data on CVD risk factors, such as smoking, alcohol and obesity were not available since the  
24  
25 58 study builds on registry data.  
26  
27  
28  
29  
30  
31  
32  
33  
34  
35  
36  
37  
38  
39  
40  
41  
42  
43  
44  
45  
46  
47  
48  
49  
50  
51  
52  
53  
54  
55  
56  
57  
58  
59  
60

## 1. Introduction

Due to earlier diagnosis and more effective treatment, the survival rate among breast cancer patients has now improved resulting in a growing population of breast cancer survivors. In The Netherlands, the 5-year-age-standardized survival rate has increased from 80% in 1995-99 to 85% in 2005-09 [1]. With breast cancer becoming a curable disease, comorbidities and death from other conditions among breast cancer survivors are of increasing concern.

One of the most important comorbidities to consider in women with breast cancer is cardiovascular disease (CVD), and with the growing number of breast cancer survivors, a better understanding of the risk of CVD in this group is crucial. Studies show that women surviving breast cancer have an increased risk of CVD morbidity and CVD-specific mortality compared with women without breast cancer [2,3]. Moreover, among breast cancer survivors, CVD-related mortality is becoming more common than breast cancer-specific mortality [4,5]. This is attributable to improvements in breast cancer survival due to early detection by screening programs and improved treatments [6,7]. Additionally, cardiotoxic effects of breast cancer therapy play a role [8,9]. Further, survivors are typically older than the general population and may be more likely to develop CVD because of risk factors common to both cancer and CVD [10].

Evidence suggests ethnic inequalities in the prognosis of breast cancer with a higher risk of breast cancer-specific and overall mortality among some ethnic minority groups [11,12]. However, although ethnic variation in cardiovascular outcomes in the general population exists [13,14], the evidence among breast cancer patients is limited. Data from the US show that African American women with breast cancer had an increased risk of dying from CVD compared with White

1  
2  
3 96 American breast cancer patients [4]. However, ethnic compositions and the national context vary  
4  
5 97 across countries and, to our knowledge, no European study has examined the risk of CVD related  
6  
7 98 outcomes in different ethnic groups among breast cancer patients. Hence, the aim of this study  
8  
9  
10 99 was to explore differences in overall CVD event, CVD admission and CVD mortality following a  
11  
12 100 diagnosis of breast cancer between the largest ethnic minority groups in The Netherlands  
13  
14 101 compared with ethnic Dutch.  
15  
16  
17 102

## 19 103 **2. Methods**

### 21 104 *Study sample*

23 105 This register-based cohort study builds on data from different Dutch nationwide registers. The  
24  
25 106 registries and linkage procedures used in this cohort study have previously been described in  
26  
27 107 detail [15]. In brief, we linked data between the national Dutch hospital discharge register, the  
28  
29 108 population register and the cause of death register using a record identification number. This  
30  
31 109 number is assigned to each resident in The Netherlands with a unique combination of birth date,  
32  
33 110 sex and postal code (84% of the Dutch population). The Dutch national hospital discharge  
34  
35 111 register and cause of death register were linked to identify all women with a first admission for  
36  
37 112 breast cancer between 1996 and 2010, using the International Classification of Diseases (ICD) 9<sup>th</sup>  
38  
39 113 revision and ICD 10<sup>th</sup> revision. Both patients with invasive (ICD-9: 174 and ICD-10: C50) and in  
40  
41 114 situ breast cancer (ICD-9: 233 and ICD-10: D05) were identified and men were excluded. Data  
42  
43 115 from the population register and the cause of death register were available until 2012 and data  
44  
45 116 from the Dutch hospital discharge register were available until 2010. Individuals were followed  
46  
47 117 from the date of their first breast cancer admission until (a) CVD admission, (b) CVD death, (c)  
48  
49 118 death due to other causes, (d) first emigration or (d) study end (31.12.2012), whichever came  
50  
51 119 first. Linkage of data from the different registries was performed in agreement with the privacy  
52  
53  
54  
55  
56  
57  
58  
59

1  
2  
3 120 legislation in The Netherlands. All linkages and analysis were performed in a secured  
4  
5 121 environment of Statistics Netherlands. The data set was made available and analysed in an  
6  
7 122 anonymous form in a secured environment of Statistics Netherlands. Prior to publication,  
8  
9  
10 123 Statistics Netherlands made sure that none of the analysis results showed potential reducibility to  
11  
12 124 the individual level.

13  
14 125  
15  
16  
17 126 *Ethnic group*  
18  
19 127 Ethnic groups were constructed based on the country of birth of the resident and her parents,  
20  
21 128 according to the definition of Statistics Netherlands [16]. A woman was considered a migrant if  
22  
23 129 she was born abroad or at least one of the parents was born abroad. Women with both parents  
24  
25  
26 130 born in The Netherlands were indicated as being Dutch. The major migrant groups residing in  
27  
28 131 The Netherlands were included, which are those born in Turkey, Suriname, Morocco, Indonesia,  
29  
30 132 and The Netherlands Antilles.

31  
32 133  
33  
34  
35 134 *Outcomes*  
36  
37 135 CVD admission after a diagnosis of breast cancer was defined as all admissions with either the  
38  
39 136 primary or secondary cause of admission coded as ICD-9: 017.2, 093, 228, 289.1–289.3, 390–  
40  
41 137 459, 557,745–747, 780.2, 782.3, 7825, 7826, 785, 786.50–786.59, 789.2, 794.30–794.39.  
42  
43 138 Cardiovascular mortality was defined as dying from a cardiovascular cause after a diagnosis of  
44  
45 139 breast cancer.

46  
47  
48 140 Overall cardiovascular event combined the two outcomes and comprised a hospital admission for  
49  
50 141 CVD, and/or a dying from a cardiovascular cause.

51  
52 142  
53  
54  
55 143 *Data analyses*

1  
2  
3 144 We first presented baseline characteristics as absolute numbers and percentages according to  
4  
5 145 ethnic group. Continuous variables were summarized as mean and standard deviation or as  
6  
7 146 median and interquartile range where appropriate. Subsequently, we calculated hazard ratios  
8  
9  
10 147 (HR) and corresponding 95% confidence intervals (95% CI) using cox proportional hazard  
11  
12 148 regression analyses to assess ethnic differences in overall cardiovascular events, and separately  
13  
14 149 for hospital admission for CVD and cardiovascular mortality between ethnic minority groups and  
15  
16 the Dutch (reference group) with adjustment for age as a continuous variable, year of admission  
17  
18 150 and type of breast cancer. Cox proportional hazard assumptions were tested by plotting the log  
19  
20 151 minus log functions for the continuous variable age. The assumptions were met in all analyses.  
21  
22 152  
23  
24 153 All analyses were performed using SPSS 22.0 (SPSS Inc., Chicago, IL, USA).  
25  
26 154

### 27 28 155 *Patient and Public Involvement*

29  
30 156 No patient or public were involved in this study.  
31  
32  
33 157

## 34 35 158 **3. Results**

36  
37 159 Table 1 presents the characteristics of the study population by ethnic group. In total, 127,714  
38  
39 160 women with a first admission for breast cancer between 01.01.1996 and 31.12.2010 were  
40  
41 161 included in the study, of which 5% belonged to an ethnic minority group (table 1). Women with  
42  
43 162 more adverse outcomes were in general followed for a shorter period. Among migrants, the  
44  
45 163 Antilleans presented the smallest group and the Indonesians the largest group. In general, the  
46  
47 164 ethnic minority groups were younger than the Dutch population when diagnosed. During follow-  
48  
49 165 up, 19% of the Dutch population experienced a hospital admission due to CVD, whereas among  
50  
51 166 the ethnic minorities the proportion of CVD admission ranged from 9% for Moroccans to 19%  
52  
53  
54  
55  
56  
57  
58  
59  
60

1  
2  
3 167 for Surinamese women. 31,203 women with breast cancer died during follow-up, of which  
4  
5 168 around 25% were due to a cardiovascular cause.

6  
7 169 Table 2 shows the incidence of a CVD event, which comprises a hospital admission for CVD,  
8  
9 and/or dying from a cardiovascular cause, among breast cancer patients by ethnic group.  
10 170 Compared with Dutch women with breast cancer, both Surinamese (HR=1.46;95% CI 1.29–1.64)  
11 171 and Turkish (HR=1.25;95% CI 1.03–1.51) women with breast cancer had a higher incidence of  
12 172 CVD event after adjustment for breast cancer diagnosis, period of breast cancer diagnosis and  
13 173 age. In contrast, Indonesian women with breast cancer had a significantly lower risk (HR=0.88;  
14 174 95% CI 0.81–0.96) of cardiovascular event compared with Dutch women. Although not  
15 175 significant, the Antillean women had a higher incidence of CVD event compared with Dutch  
16 176 women. For Moroccans, there were no differences from Dutch women.

17 178 Subsequently, we assessed cardiovascular admission and cardiovascular mortality separately.  
18 179 Table 3 shows the unadjusted and adjusted hazard ratios for a cardiovascular admission. Only  
19 180 women from Suriname had a significantly higher risk (HR=1.45;95% CI 1.28–1.64) of  
20 181 cardiovascular admission compared with Dutch women with breast cancer, whereas women from  
21 182 Indonesia had a significantly lower risk of a cardiovascular admission (HR=0.85;95% CI 0.78–  
22 183 0.93). The unadjusted and adjusted hazard ratios for cardiovascular mortality for the different  
23 184 ethnic groups are shown in table 4. The adjusted hazard ratios for cardiovascular mortality were  
24 185 significantly higher for women from Suriname (HR=1.49;95% CI 1.13–1.97) and Turkey  
25 186 (HR=1.96; 95% CI 1.27–3.01), compared with Dutch women, whereas there were no significantly  
26 187 differences between women from Indonesia and Dutch women. For Moroccan and Antillean  
27 188 women the numbers of deaths due to CVD were too small to perform analyses. In order to  
28 189 determine the impact of breast cancer treatment on the observed differences in CVD outcomes a  
29 190 sensitivity analysis was performed excluding all women with in situ breast cancer. This did not

1  
2  
3 191 change the results significantly, suggesting that cancer status and treatment of cancer is not strongly  
4  
5 192 related to CVD outcomes in our study.  
6

7 193  
8

#### 9 194 **4. Discussion**

##### 10 195 *Key findings*

11  
12 196 In this population-based cohort study of women with breast cancer in The Netherlands, the risk of  
13  
14 197 cardiovascular outcomes varied by ethnic group. Women from Suriname and Turkey had a higher  
15  
16 198 risk of a CVD event compared with Dutch women with breast cancer. When separating  
17  
18 199 cardiovascular admission and cardiovascular mortality, Surinamese and Turkish women had a  
19  
20 200 higher risk of both cardiovascular admission and cardiovascular mortality compared with Dutch  
21  
22 201 women, though in Turkish women the results for CVD admission was not significant. In contrast,  
23  
24 202 women from Indonesia with breast cancer had a lower risk of cardiovascular event, and  
25  
26 203 cardiovascular admission, but similar risk of cardiovascular mortality compared with ethnic  
27  
28 204 Dutch women with breast cancer. For Moroccan women, the risk of a cardiovascular event did  
29  
30 205 not differ from Dutch women with breast cancer, whereas for Antillean women the risk was not  
31  
32 206 significantly higher.  
33  
34  
35  
36  
37  
38  
39

40 207

##### 41 208 *Discussion of key findings*

42 209 Evidence shows that ethnic minority and migrant groups in general have a lower risk of breast  
43  
44 210 cancer compared with the majority population [17,18]. However, the results of this study indicate  
45  
46 211 that among breast cancer patients, some ethnic minority groups are disadvantaged in terms of  
47  
48 212 cardiovascular outcomes compared with Dutch women. The results of this study are in line with  
49  
50 213 the sparse evidence on ethnic differences in CVD mortality among breast cancer patients in the  
51  
52 214 US, which also found some ethnic minority groups to be disadvantaged in terms of  
53  
54  
55  
56  
57  
58  
59



1  
2  
3 215 cardiovascular mortality [4,19]. For example, African America women with ductal carcinoma in  
4  
5 216 situ of the breast were found to have a higher risk of CVD death compared with White American  
6  
7 217 women diagnosed with ductal carcinoma in situ of the breast [4]. However, even though CVD  
8  
9 218 have been shown to vary by ethnic group [13,20] data among breast cancer patients in Europe  
10  
11 219 have been lacking. Previous European studies on ethnic disparities in breast cancer prognosis  
12  
13 220 have mostly focused on mortality after breast cancer diagnosis, and found that some ethnic  
14  
15 221 minority groups have higher overall and breast cancer-specific mortality [11,12,21]. Our results  
16  
17 222 thereby add a great value to the existing literature by showing that women with breast cancer  
18  
19 223 from Suriname and Turkey are disadvantaged in terms of cardiovascular outcomes compared  
20  
21 224 with Dutch women with breast cancer. The higher incidence of CVD event among Surinamese  
22  
23 225 women with breast cancer reflects the pattern of CVD among Surinamese women in the general  
24  
25 226 Dutch population. Previous studies of the general population in The Netherlands showed that  
26  
27 227 Surinamese women have a higher risk of both AMI and stroke compared with Dutch women  
28  
29 228 [22,23], as well as a higher 5-year CVD mortality after initial admission for CVD [24]. Turkish  
30  
31 229 women with breast cancer were in the present study found to have a higher incidence of CVD  
32  
33 230 event, compared with Dutch women with breast cancer. However, this only partly reflects on the  
34  
35 231 pattern among Turkish women in the general population in The Netherlands. Previous studies of  
36  
37 232 the general population in The Netherlands did not find differences in the incidence of stroke or  
38  
39 233 AMI among Turkish women compared with the Dutch majority women [22,23]. However, when  
40  
41 234 stratifying on age, a higher incidence of AMI were observed in 50- to 70-year-old Turkish  
42  
43 235 women compared with the Dutch majority women [22].  
44  
45  
46  
47  
48  
49  
50  
51  
52

53 237 The relatively low risk of CVD outcomes among Indonesian women with breast cancer are in  
54  
55 238 contrast to previous studies of the general Dutch population that found no differences in  
56  
57  
58  
59  
60

1  
2  
3 239 incidence of AMI and a slightly higher risk of stroke among Indonesians compared with Dutch  
4  
5 240 women [22,23]. The reasons for the better CVD prognosis among Indonesian breast cancer  
6  
7 241 patients are unclear. However, Indonesians are well integrated in the Dutch society with respect  
8  
9  
10 242 to language and culture and have similar income levels and are employed at equal rates as the  
11  
12 243 Dutch general population [25]. This possibly results in better access to health care services than  
13  
14 244 other minority groups and may underlie the better cardiovascular health outcomes among  
15  
16 245 Indonesian women with breast cancer.  
17  
18

19 246  
20  
21 247 Possible explanations for the higher risk of cardiovascular events among Surinamese and Turkish  
22  
23 248 breast cancer patients may include disparities in access to health care services and a high risk  
24  
25 249 factor burden among these ethnic minorities in The Netherlands. Regular health visits are  
26  
27 250 important for early diagnosis of risk factors that can lead to CVD progression and it is possible  
28  
29 251 that differences in health service utilisation may contribute to the observed ethnic differences in  
30  
31 252 CVD risk among breast cancer patients. Evidence on health care utilization among breast cancer  
32  
33 253 patients is scarce, but previous evidence of the general population in The Netherlands suggests  
34  
35 254 that some ethnic minority populations use more general practitioner care than Dutch people do,  
36  
37 255 but that they are less likely to use specialised care [26]. Moreover, ethnic differences in use of  
38  
39 256 cardiac rehabilitation and lower adherence to medication therapy have been shown [27–30]. A  
40  
41 257 Danish study found that immigrants from Pakistan and Turkey did not receive adequate medical  
42  
43 258 treatment with beta-blockers after a first AMI compared with Danish-born residents [28]. In  
44  
45 259 addition, in The Netherlands, Surinamese people have been found to have poor blood pressure  
46  
47 260 control compared with their Dutch counterparts [30].  
48  
49  
50  
51  
52

53 261 The relatively high incidence of CVD admission and mortality among Turkish and Surinamese  
54  
55 262 breast cancer women may be explained by the high prevalence of cardiovascular risk factors in  
56  
57  
58  
59  
60

1  
2  
3 263 these populations. The current study lacked information on CVD risk factor and we were  
4  
5 264 therefore not able to address the possible contribution of these to the observed ethnic differences.  
6  
7 265 However, previous studies of Surinamese and Turkish populations in The Netherlands showed  
8  
9 266 that hypertension, diabetes mellitus and obesity are more common among these populations  
10  
11 267 compared with the Dutch general population [30–33]. As an example, a previous Dutch study  
12  
13 268 showed that the prevalence of hypertension, the leading risk factor for CVD worldwide, was  
14  
15 269 higher in both Turkish and Surinamese people than in Dutch people [30]. A previous study found  
16  
17 270 that Antillean women have higher risk of certain CVD risk factors than Dutch women [34].  
18  
19 271 Further, since Antilleans resemble other ethnic groups who have been found to have higher risk  
20  
21 272 of some CVD risk factors, such as Surinamese women with African background, this might be  
22  
23 273 the case for Antillean women as well and suggests the need for further study among this  
24  
25 274 population in The Netherlands. In addition, a study from the US, found that African American  
26  
27 275 breast cancer patients have higher prevalence of certain CVD risk factors, such as hypertension,  
28  
29 276 diabetes and obesity, prior to initiating aromatase inhibitory therapy, compared with White  
30  
31 277 American breast cancer patients of the same age [35]. Although the ethnic groups are not directly  
32  
33 278 comparable, this may also be the case for some of the ethnic groups in the current study, such as  
34  
35 279 the African Surinamese and Antillean women. Evidence suggests that the presence of CVD risk  
36  
37 280 factors among breast cancer patients at diagnosis is a strong predictive factor for the development  
38  
39 281 of cardiovascular damage associated with breast cancer therapy [36]. The higher risk factor  
40  
41 282 burden in some ethnic minority groups may therefore contribute to the higher incidence of CVD  
42  
43 283 in these groups.  
44  
45  
46  
47  
48  
49

50  
51 284 Additionally, since the risk of CVD has been shown to vary according to breast cancer therapy  
52  
53 285 [9,37], the observed differences may be explained by variation in the treatment received by  
54  
55 286 different ethnic groups. In the current study, data on treatment was not available. However,  
56  
57  
58  
59

1  
2  
3 287 studies from the US and UK have reported that ethnic minority women were more likely to  
4  
5 288 receive chemotherapy, which was largely explained by more advanced stage and higher grade  
6  
7 289 tumours [38,39].  
8  
9

10 290  
11  
12 291 Our findings have important clinical and public health implications because identifying breast  
13  
14 292 cancer patients who are most vulnerable to cardiovascular outcomes is important in order to  
15  
16 293 guide strategies among breast cancer patients. The findings suggest the need to increase attention  
17  
18 294 for these women in the cardiovascular risk factor management guidelines in The Netherlands and  
19  
20 295 awareness of the observed ethnic differences in the risk of cardiovascular outcomes among breast  
21  
22 296 cancer patients should be raised among clinicians and incorporated into oncology practices. The  
23  
24 297 observed differences suggest the need for further studies to identify factors explaining these  
25  
26 298 differences. More specific, studies addressing the potential contribution of both CVD risk factors  
27  
28 299 and type of treatment to the observed ethnic differences found in this study are needed. This will  
29  
30  
31 300 help to tailor appropriate public health and clinical interventions to improve outcomes among  
32  
33 301 breast cancer patients most at risk of adverse CVD outcomes.  
34  
35  
36  
37  
38  
39

40 303 *Strength and limitations:*

41  
42 304 The strength of the current study is the validity of the registries, the linkage methods, and the lack  
43  
44 305 of selection of the cohorts. A high validity of both the Dutch National Hospital Discharge  
45  
46 306 Register and the Dutch Population Register has been demonstrated. In a random sample of the  
47  
48 307 Hospital Discharge Register, 99% of the personal, admission and discharge data and 84% of the  
49  
50 308 principal diagnoses (validated through medical record review by medical specialists) were  
51  
52 309 correctly registered [40]. In addition, over 97% of the uniquely linked hospital admissions  
53  
54  
55  
56  
57  
58  
59  
60

1  
2  
3 310 resulting from linkage of the Hospital Discharge Register with the Population Register were  
4  
5 311 shown to be correctly linked [41].  
6

7 312 Nonetheless, some limitations must be considered. First, although the study is based on a  
8  
9 313 nationwide cohort of breast cancer patients, absolute numbers are somewhat small when divided  
10  
11 314 into different ethnic groups. Consequently, the numbers were too small to investigate different  
12  
13 315 kinds of CVD, which could have afforded a more nuanced picture. Second, inherent to many  
14  
15 316 national-level databases, we lack detailed data on CVD risk factors, such as smoking, alcohol,  
16  
17 317 cholesterol and obesity, and therefore we were unable to do additional analyses to assess the  
18  
19 318 contribution of these to the observed ethnic differences. However, we were able to shed light on  
20  
21 319 the potential contributing risk factors to the observed differences due to previous studies on  
22  
23 320 ethnic differences in risk factors in The Netherlands [30–33]. Additionally, the study lack data on  
24  
25 321 treatment of breast cancer. Since, CVD risk has been shown to vary according to type of  
26  
27 322 treatment [9,37], adjustment for treatment would have been preferable in order to assess the  
28  
29 323 potential impact of differences in treatment to the observed ethnic differences in CVD. Finally, as  
30  
31 324 in numerous studies, the classifications of the various ethnic groups were based on country of  
32  
33 325 birth. Country of birth may reflect ethnicity reasonably well among some ethnic groups but is  
34  
35 326 likely to be an unreliable proxy measure of ethnicity for other groups such as Surinamese [16].  
36  
37 327 The results may be generalised to other European settings with similar health care services and  
38  
39 328 composition of ethnic groups.  
40  
41  
42  
43  
44  
45  
46

47 329

## 48 330 **5. Conclusion**

49  
50  
51 331 The results of the current study suggest that the risk of CVD related outcomes among breast  
52  
53 332 cancer patients vary by ethnicity. Surinamese and Turkey breast cancer patients experienced a  
54  
55 333 higher risk, whereas Indonesian patients had a slightly lower risk of CVD event compared with  
56  
57  
58  
59  
60

1  
2  
3 334 their Dutch counterparts. More extensive cohort studies are needed to identify the forms of CVD  
4  
5 335 that are most common in these groups as well as the potential factors contributing to these  
6  
7 336 differences.  
8  
9

10 337

11  
12 338 **Competing interest:** None declared.  
13

14 339

### 15 340 **Funding**

16  
17 341 This work was supported by the Dutch Heart Foundation (grant number 2010B296).  
18  
19 342

20  
21 343

### 22 344 **Contributor ship statement**

23  
24 345 LD, JB, IV, MLB, MN, CA were involved in the study design. LD and CA wrote the paper. JB  
25  
26 346 analysed the data. JB, IV, MLB and MN critically revised the manuscript. All Authors approved  
27  
28 347 the final version of the manuscript.  
29  
30

31 348

### 32 349 **Data sharing statement**

33 350 No additional data are available.  
34  
35  
36  
37  
38  
39  
40  
41  
42  
43  
44  
45  
46  
47  
48  
49  
50  
51  
52  
53  
54  
55  
56  
57  
58  
59  
60

358 **References**

- 359 [1] C. Allemani, H.K. Weir, H. Carreira, R. Harewood, D. Spika, X.S. Wang, F. Bannon, J. V.  
360 Ahn, C.J. Johnson, A. Bonaventure, R. Marcos-Gragera, C. Stiller, G. Azevedo E Silva,  
361 W.Q. Chen, O.J. Ogunbiyi, B. Rachet, M.J. Soeberg, H. You, T. Matsuda, M. Bielska-  
362 Lasota, H. Storm, T.C. Tucker, M.P. Coleman, Global surveillance of cancer survival  
363 1995-2009: Analysis of individual data for 25 676 887 patients from 279 population-based  
364 registries in 67 countries (CONCORD-2), *Lancet*. 385 (2015) 977–1010.
- 365 [2] S.H. Armenian, L. Xu, B. Ky, C. Sun, L.T. Farol, S.K. Pal, P.S. Douglas, S. Bhatia, C.  
366 Chao, Cardiovascular disease among survivors of adult-onset cancer: A community-based  
367 retrospective cohort study, *J. Clin. Oncol.* 34 (2016) 1122–1130.
- 368 [3] P.T. Bradshaw, J. Stevens, N. Khankari, S.L. Teitelbaum, A.I. Neugut, M.D. Gammon,  
369 Cardiovascular Disease Mortality Among Breast Cancer Survivors, *Epidemiology*. 27  
370 (2016) 6–13.
- 371 [4] A. Berkman, B. F. Cole, P.A. Ades, S. Dickey, S.T. Higgins, A. Trentham-Dietz, B.L.  
372 Sprague, S.G. Lakoski, Racial differences in breast cancer, cardiovascular disease, and all-  
373 cause mortality among women with ductal carcinoma in situ of the breast, *Breast Cancer*  
374 *Res. Treat.* 148 (2014) 407–413.
- 375 [5] J.L. Patnaik, T. Byers, C. DiGuseppi, D. Dabelea, T.D. Denberg, Cardiovascular disease  
376 competes with breast cancer as the leading cause of death for older females diagnosed with  
377 breast cancer: a retrospective cohort study, *Breast Cancer Res.* 13 (2011) R64.
- 378 [6] D. Berry, K. Cronin, S. Plevritis, D. Fryback, L. Clarke, M. Zelen, J. Mandelblatt, A.  
379 Yakovlev, D. Habbema, E. Feuer, Effect of screening and adjuvant therapy on mortality  
380 from breast cancer, *N. Engl. J. Med.* 353 (2005) 1784–92.  
381 <http://www.nejm.org/doi/full/10.1056/nejmoa050518>.

- 1  
2  
3 382 [7] E.R. Myers, P. Moorman, J.M. Gierisch, L.J. Havrilesky, L.J. Grimm, S. Ghate, B.  
4  
5 383 Davidson, R.C. Montgomery, M.J. Crowley, D.C. McCrory, A. Kendrick, G.D. Sanders,  
6  
7 384 Benefits and harms of breast cancer screening: A systematic review, *JAMA - J. Am. Med.*  
8  
9 385 *Assoc.* 314 (2015) 1615–1634. doi:10.1001/jama.2015.13183.  
10  
11  
12 386 [8] S.C. Darby, M. Ewertz, P. McGale, A.M. Bennet, U. Blom-Goldman, D. Brønnum, C.  
13  
14 387 Correa, D. Cutter, G. Gagliardi, B. Gigante, M.-B. Jensen, A. Nisbet, R. Peto, K. Rahimi,  
15  
16 388 C. Taylor, P. Hall, Risk of ischemic heart disease in women after radiotherapy for breast  
17  
18 389 cancer., *N. Engl. J. Med.* 368 (2013) 987–98.  
19  
20  
21 390 [9] P. Thavendiranathan, H. Abdel-Qadir, H.D. Fischer, X. Camacho, E. Amir, P.C. Austin,  
22  
23 391 D.S. Lee, Breast Cancer Therapy-Related Cardiac Dysfunction in Adult Women Treated in  
24  
25 392 Routine Clinical Practice: A Population-Based Cohort Study., *J. Clin. Oncol.* 34 (2016)  
26  
27 393 *JCO.*2015.65.1505-.  
28  
29  
30 394 [10] K.E. Weaver, R.E. Foraker, C.M. Alfano, J.H. Rowland, N.K. Arora, K.M. Bellizzi, A.S.  
31  
32 395 Hamilton, I. Oakley-Girvan, G. Keel, N.M. Aziz, Cardiovascular risk factors among long-  
33  
34 396 term survivors of breast, prostate, colorectal, and gynecologic cancers: A gap in  
35  
36 397 survivorship care?, *J. Cancer Surviv.* 7 (2013) 253–261.  
37  
38  
39 398 [11] H. Møller, K. Henson, M. Lüchtenborg, J. Broggio, J. Charman, V.H. Coupland, E.  
40  
41 399 Davies, R.H. Jack, R. Sullivan, P. Vedsted, K. Horgan, N. Pearce, A. Purushotham, Short-  
42  
43 400 term breast cancer survival in relation to ethnicity, stage, grade and receptor status:  
44  
45 401 national cohort study in England, *Br. J. Cancer.* (2016) 1–8.  
46  
47  
48 402 [12] F. Latif, J. Helgeland, G. Bukholm, I.R.K. Bukholm, Ethnicity differences in breast cancer  
49  
50 403 stage at the time of diagnosis in Norway, *Scand. J. Surg.* 104 (2015) 248–253.  
51  
52  
53 404 [13] A.A.M. Van Oeffelen, I. Vaartjes, K. Stronks, M.L. Bots, C. Agyemang, Incidence of  
54  
55 405 acute myocardial infarction in first and second generation minority groups: Does the  
56  
57  
58  
59  
60



- 1  
2  
3 406 second generation converge towards the majority population?, *Int. J. Cardiol.* 168 (2013)  
4  
5 407 5422–5429.  
6  
7  
8 408 [14] R.S. Bhopal, N. Bansal, C.M. Fischbacher, H. Brown, S. Capewell, Ethnic variations in  
9  
10 409 heart failure: Scottish Health and Ethnicity Linkage Study (SHELs)., *Heart.* 98 (2012)  
11  
12 410 468–73.  
13  
14 411 [15] H.L. Koek, A. de Bruin, A. Gast, E. Gevers, J.W.P.F. Kardaun, J.B. Reistma, D.E.  
15  
16 412 Grobbee, M.L. Bots, Incidence of first acute myocardial infarction in the Netherlands, *Neth.*  
17  
18 413 *J. Med.* 65 (2007) 434–441.  
19  
20 414 [16] K. Stronks, I. Kulu-Glasgow, C. Agyemang, The utility of “country of birth” for the  
21  
22 415 classification of ethnic groups in health research: the Dutch experience., *Ethn. Health.* 14  
23  
24 416 (2009) 255–269.  
25  
26  
27 417 [17] M. Arnold, M.J. Aarts, S. Siesling, M. Van Der Aa, O. Visser, J.W. Coebergh, Diverging  
28  
29 418 breast and stomach cancer incidence and survival in migrants in The Netherlands, 1996-  
30  
31 419 2009., *Acta Oncol.* 52 (2013) 1195–1201.  
32  
33  
34 420 [18] T. Gathani, R. Ali, A. Balkwill, J. Green, G. Reeves, V. Beral, K.A. Moser, Million  
35  
36 421 Women Study Collaborators, Ethnic differences in breast cancer incidence in England are  
37  
38 422 due to differences in known risk factors for the disease: prospective study., *Br. J. Cancer.*  
39  
40 423 110 (2014) 224–9.  
41  
42  
43 424 [19] P.A. Solanki, N.Y. Ko, D.M. Qato, G.S. Calip, Risk of cancer-specific, cardiovascular, and  
44  
45 425 all-cause mortality among Asian and Pacific Islander breast cancer survivors in the United  
46  
47 426 States, 1991-2011., *Springerplus.* 5 (2016) 82.  
48  
49  
50 427 [20] N.F. Hempler, F.B. Larsen, S.S. Nielsen, F. Diderichsen, A.H. Andreasen, T. Jørgensen, A  
51  
52 428 registry-based follow-up study, comparing the incidence of cardiovascular disease in  
53  
54 429 native Danes and immigrants born in Turkey, Pakistan and the former Yugoslavia: do  
55  
56  
57  
58  
59  
60

- 1  
2  
3 430 social inequalities play a role?, *BMC Public Health*. 11 (2011) 662.  
4  
5 431 [21] E. Copson, T. Maishman, S. Gerty, B. Eccles, L. Stanton, R.I. Cutress, D.G. Altman, L.  
6  
7 432 Durcan, P. Simmonds, L. Jones, W. Tapper, D. Eccles, Ethnicity and outcome of young  
8  
9 433 breast cancer patients in the United Kingdom: the POSH study., *Br. J. Cancer*. 110 (2014)  
10  
11 434 230–41.  
12  
13  
14 435 [22] A.A.M. Van Oeffelen, C. Agyemang, K. Stronks, M.L. Bots, I. Vaartjes, Incidence of first  
15  
16 436 acute myocardial infarction over time specific for age , sex , and country of birth, (2014)  
17  
18 437 20–27.  
19  
20  
21 438 [23] C. Agyemang, A.A.M. Van Oeffelen, M. Norredam, L.J. Kappelle, C.J.M. Klijn, M.L.  
22  
23 439 Bots, K. Stronks, I. Vaartjes, Ethnic disparities in ischemic stroke, intracerebral  
24  
25 440 hemorrhage, and subarachnoid hemorrhage incidence in the Netherlands, *Stroke*. 45 (2014)  
26  
27 441 3236–3242.  
28  
29  
30 442 [24] C. Agyemang, I. Vaartjes, M.L. Bots, I.G. van Valkengoed, J.S. de Munter, A. de Bruin,  
31  
32 443 M. Berger-van Sijl, J.B. Reitsma, K. Stronks, Risk of death after first admission for  
33  
34 444 cardiovascular diseases by country of birth in The Netherlands: a nationwide record-linked  
35  
36 445 retrospective cohort study., *Heart*. 95 (2009) 747–753.  
37  
38  
39 446 [25] L. Ho, V. Bos, A.E. Kunst, Differences in cause-of-death patterns between the native  
40  
41 447 Dutch and persons of Indonesian descent in the Netherlands, *Am. J. Public Health*. 97  
42  
43 448 (2007) 1616–1618.  
44  
45  
46 449 [26] K. Stronks, a C. Ravelli, S. a Reijneveld, Immigrants in the Netherlands: equal access for  
47  
48 450 equal needs?, *J. Epidemiol. Community Health*. 55 (2001) 701–707.  
49  
50  
51 451 [27] O. Cortes, H.M. Arthur, Determinants of referral to cardiac rehabilitation programs in  
52  
53 452 patients with coronary artery disease: A systematic review, *Am. Heart J*. 151 (2006) 249–  
54  
55 453 256.  
56  
57  
58  
59  
60

- 1  
2  
3 454 [28] N.F. Hempler, F. Diderichsen, F.B. Larsen, S. Ladelund, T. Jørgensen, Do immigrants  
4  
5 455 from Turkey, Pakistan and Yugoslavia receive adequate medical treatment with beta-  
6  
7 456 blockers and statins after acute myocardial infarction compared with Danish-born  
8  
9  
10 457 residents? A register-based follow-up study, *Eur. J. Clin. Pharmacol.* 66 (2010) 735–742.  
11  
12 458 [29] G. Feder, A.M. Crook, P. Magee, S. Banerjee, A.D. Timmis, H. Hemingway, Ethnic  
13  
14 459 differences in invasive management of coronary disease: Prospective cohort study of  
15  
16 460 patients undergoing angiography, *BMJ Br. Med. J.* 324 (2002) 511–516.  
17  
18  
19 461 [30] C. Agyemang, S. Kieft, M.B. Snijder, E.J. Beune, B.J. Van Den Born, L.M. Brewster, J.J.  
20  
21 462 Ujcic-Voortman, N. Bindraban, G. Van Montfrans, R.J. Peters, K. Stronks, Hypertension  
22  
23 463 control in a large multi-ethnic cohort in Amsterdam, The Netherlands: The HELIUS study,  
24  
25 464 *Int. J. Cardiol.* 183 (2015) 180–189.  
26  
27  
28 465 [31] J.K. Ujcic-Voortman, M.T. Schram, M.A. Jacobs-Van Der Bruggen, A.P. Verhoeff, C.A.  
29  
30 466 Baan, Diabetes prevalence and risk factors among ethnic minorities, *Eur. J. Public Health.*  
31  
32 467 19 (2009) 511–515.  
33  
34  
35 468 [32] N.R. Bindraban, I.G.M. van Valkengoed, G. Mairuhu, F. Holleman, J.B.L. Hoekstra,  
36  
37 469 B.P.J. Michels, R.P. Koopmans, K. Stronks, Prevalence of diabetes mellitus and the  
38  
39 470 performance of a risk score among Hindustani Surinamese, African Surinamese and ethnic  
40  
41 471 Dutch: a cross-sectional population-based study., *BMC Public Health.* 8 (2008) 271.  
42  
43  
44 472 [33] J.K. Ujcic-Voortman, G. Bos, C.A. Baan, A.P. Verhoeff, J.C. Seidell, Obesity and body fat  
45  
46 473 distribution: Ethnic differences and the role of socio-economic status, *Obes. Facts.* 4  
47  
48 474 (2011) 53–60.  
49  
50  
51 475 [34] F. El Fakiri, M.A. Bruijnzeels, M.M.E. Foets, A.W. Hoes, Different distribution of  
52  
53 476 cardiovascular risk factors according to ethnicity: A study in a high risk population, *J.*  
54  
55 477 *Immigr. Minor. Heal.* 10 (2008) 559–565. doi:10.1007/s10903-008-9144-4.

- 1  
2  
3 478 [35] L. Gallicchio, C. Calhoun, K. Helzlsouer, Cardiovascular Health among Black and White  
4  
5 479 Breast Cancer Patients Initiating Aromatase Inhibitor Therapy, *Clin. Breast Cancer*. 16  
6  
7 480 (2016) e23–e31.
- 8  
9  
10 481 [36] N. Maurea, C. Coppola, G. Ragone, G. Frasci, A. Bonelli, C. Romano, R.V. Iaffaioli,  
11  
12 482 Women survive breast cancer but fall victim to heart failure: the shadows and lights of  
13  
14 483 targeted therapy., *J. Cardiovasc. Med. (Hagerstown)*. 11 (2010) 861–868.
- 15  
16  
17 484 [37] E.J. Bowles, R. Wellman, H.S. Feigelson, A.A. Onitilo, A.N. Freedman, T. Delate, L.A.  
18  
19 485 Allen, L. Nekhlyudov, K.A. Goddard, R.L. Davis, L.A. Habel, M.U. Yood, C. McCarty,  
20  
21 486 D.J. Magid, E.H. Wagner, P.S. Team, Risk of heart failure in breast cancer patients after  
22  
23 487 anthracycline and trastuzumab treatment: a retrospective cohort study, *J. Natl. Cancer Inst.*  
24  
25 488 104 (2012) 1293–1305.
- 26  
27  
28 489 [38] R.H. Jack, E.A. Davies, H. Møller, Breast cancer incidence , stage , treatment and survival  
29  
30 490 in ethnic groups in South East England, (2009) 545–550.
- 31  
32  
33 491 [39] B.K. Killelea, V.Q. Yang, S. Wang, B. Hayse, S. Mougalian, N.R. Horowitz, A.B.  
34  
35 492 Chagpar, L. Pusztai, D.R. Lannin, N.R. Horowitz, B. Anees, Racial Differences in the Use  
36  
37 493 and Outcome of Neoadjuvant Chemotherapy for Breast Cancer : Results From the National  
38  
39 494 Cancer Data Base, 33 (2017) 4267–4276.
- 40  
41  
42 495 [40] G. Paas, K. Veenhuizen, Research on the validity of the LMR (in Dutch), *Prismant*.  
43  
44 496 (2002).
- 45  
46  
47 497 [41] A. De Bruin, J. Kardaun, F. Gast, E. De Bruin, M. Van Sijl, G. Verweij, Record linkage of  
48  
49 498 hospital discharge register with population register : Experiences at Statistics Netherlands,  
50  
51 499 *Stat. Bruin A De, Kardaun J, Gast F, Bruin E De, Sijl M Van, Verweij G. Rec. Link. Hosp.*  
52  
53 500 *Disch. Regist. with Popul. Regist. Exp. Stat. Netherlands. Stat. (Ber)*. 2004;2123–32. S.  
54  
55 501 21 (2004) 23–32.

502 **Table 1** Demographic and disease characteristics of women admitted for breast cancer between  
 503 1996 and 2010 in The Netherlands according to ethnic group

|                                              | <b>Ethnic Dutch</b><br>N % | <b>Antillean</b><br>N % | <b>Indonesian</b><br>N % | <b>Moroccan</b><br>N % | <b>Surinamese</b><br>N % | <b>Turkish</b><br>N % |
|----------------------------------------------|----------------------------|-------------------------|--------------------------|------------------------|--------------------------|-----------------------|
| <b>No. of patients</b>                       | 120,809 (100)              | 454 (100)               | 3,457 (100)              | 919 (100)              | 1,351 (100)              | 724 (100)             |
| <b>Mean age at diagnosis (y), sd</b>         | 60.4 (13.3)                | 52.8 (11.8)             | 57.0 (13.1)              | 47.0 (10.7)            | 52.8 (12.7)              | 49.5 (11.4)           |
| <b>Attained age (y) end of follow-up</b>     |                            |                         |                          |                        |                          |                       |
| ≤ 44                                         | 5,029 (4.2)                | 53 (11.7)               | 206 (6.0)                | 230 (25.0)             | 172 (12.7)               | 125 (17.3)            |
| 45-59                                        | 31,731 (26.3)              | 197 (43.4)              | 1,262 (36.5)             | 476 (51.8)             | 582 (43.1)               | 336 (46.4)            |
| 60-74                                        | 46,671 (38.6)              | 169 (37.2)              | 1,199 (34.7)             | 185 (20.1)             | 421 (31.2)               | 225 (31.1)            |
| ≥ 75                                         | 37,378 (30.9)              | 35 (7.7)                | 790 (22.9)               | 28 (3.0)               | 176 (13.0)               | 38 (5.2)              |
| <b>Follow-up time (y), median (IQR)</b>      | 4.5 (6.5)                  | 3.6 (5.8)               | 4.6 (5.5)                | 3.6 (6.0)              | 3.8 (6.0)                | 4.0 (6.0)             |
| <b>Breast cancer diagnosis</b>               |                            |                         |                          |                        |                          |                       |
| In situ                                      | 9,774 (8.1)                | 45 (9.9)                | 336 (9.7)                | 91 (9.9)               | 131 (9.7)                | 62 (8.6)              |
| Invasive                                     | 111,035 (91.9)             | 409 (90.1)              | 3,121 (90.3)             | 828 (90.1)             | 1,220 (90.3)             | 662 (91.4)            |
| <b>Period of breast cancer diagnosis (y)</b> |                            |                         |                          |                        |                          |                       |
| 1996-1999                                    | 28,869 (23.9)              | 66 (14.5)               | 743 (21.5)               | 115 (12.5)             | 230 (17.0)               | 104 (14.4)            |
| 2000-2003                                    | 32,196 (26.7)              | 121 (26.7)              | 912 (26.4)               | 201 (21.9)             | 326 (24.1)               | 187 (25.8)            |
| 2004-2007                                    | 33,385 (27.6)              | 139 (30.6)              | 990 (28.6)               | 289 (31.4)             | 420 (31.1)               | 222 (30.7)            |
| 2008-2010                                    | 26,359 (21.8)              | 128 (28.2)              | 812 (23.5)               | 314 (34.2)             | 375 (27.8)               | 211 (29.1)            |
| <b>Marital status</b>                        |                            |                         |                          |                        |                          |                       |
| Single/ widowed/ divorced                    | 53,860 (44.6)              | 268 (59.0)              | 1,701 (49.2)             | 301 (32.8)             | 820 (60.7)               | 277 (38.3)            |
| Living with partner/ married                 | 66,949 (55.4)              | 186 (41.0)              | 1,756 (50.8)             | 618 (67.2)             | 531 (39.3)               | 447 (61.7)            |
| <b>Hospital admissions</b>                   |                            |                         |                          |                        |                          |                       |
| CVD                                          | 23,431 (19.4)              | 68 (15.0)               | 515 (14.9)               | 85 (9.2)               | 259 (19.2)               | 101 (14.0)            |
| - Heart failure                              | 3,426 (2.8)                | 11 (2.4)                | 66 (1.9)                 | 13 (1.4)               | 30 (2.2)                 | 16 (2.2)              |
| - Myocardial infarction                      | 1,482 (1.2)                | <10 <sup>a</sup>        | 25 (0.7)                 | <10 <sup>a</sup>       | <10 <sup>a</sup>         | <10 <sup>a</sup>      |
| - Cerebrovascular disease                    | 3,529 (2.9)                | <10 <sup>a</sup>        | 82 (2.4)                 | <10 <sup>a</sup>       | 34 (2.5)                 | <10 <sup>a</sup>      |
| <b>Death during follow-up</b>                |                            |                         |                          |                        |                          |                       |
| Total deaths                                 | 29,966 (24.8)              | 101 (22.2)              | 665 (19.2)               | 124 (13.5)             | 251 (18.6)               | 96 (13.3)             |
| Breast cancer cause                          | 12,279 (10.2)              | 64 (14.1)               | 301 (8.7)                | 82 (8.9)               | 136 (10.1)               | 51 (7.0)              |
| Cardiovascular cause                         | 7,438 (6.2)                | <10 <sup>a</sup>        | 158 (4.6)                | 11 (1.2)               | 50 (3.7)                 | 21 (2.9)              |
| Other causes                                 | 10,249 (8.5)               | <10                     | 206 (6.0)                | 31 (3.4)               | 65 (4.8)                 | 24 (3.3)              |

Abbreviations: CVD = cardiovascular disease, IQR = Interquartile range, y = years

<sup>a</sup> = Not given in line with the Dutch data protection guideline as the number of cases was less than 10

504

505

506 **Table 2** Unadjusted and adjusted hazard ratios (95% CI) for a cardiovascular event by ethnic  
507 group

|                     | <b>Unadjusted<br/>HR (95% CI)</b> | <b>Adjusted<br/>HR (95% CI)</b> |
|---------------------|-----------------------------------|---------------------------------|
| <b>Ethnic group</b> |                                   |                                 |
| Dutch               | 1.00 (Ref.)                       | 1.00 (Ref.)                     |
| Surinamese          | 1.03 (0.92-1.16)                  | 1.46 (1.29-1.64)                |
| Moroccans           | 0.51 (0.42-0.63)                  | 1.01 (0.83-1.24)                |
| Turkish             | 0.71 (0.59-0.86)                  | 1.25 (1.03-1.51)                |
| Antilleans          | 0.83 (0.66-1.04)                  | 1.24 (0.98-1.56)                |
| Indonesians         | 0.76 (0.70-0.82)                  | 0.88 (0.81-0.96)                |

508 Adjusted for age, year of admission and type of breast cancer

509  
510  
511  
512 **Table 3** Unadjusted and adjusted hazard ratios (95% CI) for a cardiovascular admission by ethnic  
513 group

|                     | <b>Unadjusted<br/>HR (95% CI)</b> | <b>Adjusted<br/>HR (95% CI)</b> |
|---------------------|-----------------------------------|---------------------------------|
| <b>Ethnic group</b> |                                   |                                 |
| Dutch               | 1.00 (Ref.)                       | 1.00 (Ref.)                     |
| Surinamese          | 1.09 (0.96-1.23)                  | 1.45 (1.28-1.64)                |
| Moroccans           | 0.53 (0.43-0.66)                  | 0.92 (0.75 -1.14)               |
| Turkish             | 0.76 (0.63-0.93)                  | 1.21(0.99-1.47)                 |
| Antilleans          | 0.89 (0.70-1.13)                  | 1.24 (0.98-1.57)                |
| Indonesians         | 0.75 (0.69-0.82)                  | 0.85 (0.78-0.93)                |

514 Adjusted for age, year of admission and type of breast cancer

515  
516  
517  
518 **Table 4** Unadjusted and adjusted hazard ratios (95% CI) for cardiovascular mortality by ethnic  
519 group

|                     | <b>Unadjusted<br/>HR (95% CI)</b> | <b>Adjusted<br/>HR (95% CI)</b> |
|---------------------|-----------------------------------|---------------------------------|
| <b>Ethnic group</b> |                                   |                                 |
| Dutch               | 1.00 (Ref.)                       | 1.00 (Ref.)                     |
| Surinamese          | 0.70 (0.53-0.93)                  | 1.49 (1.13-1.97)                |
| Turkish             | 0.55 (0.36-0.84)                  | 1.96 (1.27-3.01)                |
| Indonesians         | 0.76 (0.65-0.89)                  | 0.99 (0.84-1.16)                |

520 Adjusted for age, year of admission and type of breast cancer

521 The number of cardiovascular mortality for the Antilleans and Moroccan women were too low.

**STROBE 2007 (v4) checklist of items to be included in reports of observational studies in epidemiology\***  
**Checklist for cohort, case-control, and cross-sectional studies (combined)**

| Section/Topic             | Item # | Recommendation                                                                                                                                                                                                                                                                                                                                                                                                                                                         | Reported on page # |
|---------------------------|--------|------------------------------------------------------------------------------------------------------------------------------------------------------------------------------------------------------------------------------------------------------------------------------------------------------------------------------------------------------------------------------------------------------------------------------------------------------------------------|--------------------|
| Title and abstract        | 1      | (a) Indicate the study's design with a commonly used term in the title or the abstract                                                                                                                                                                                                                                                                                                                                                                                 | 1 and 2            |
|                           |        | (b) Provide in the abstract an informative and balanced summary of what was done and what was found                                                                                                                                                                                                                                                                                                                                                                    | 2                  |
| <b>Introduction</b>       |        |                                                                                                                                                                                                                                                                                                                                                                                                                                                                        |                    |
| Background/rationale      | 2      | Explain the scientific background and rationale for the investigation being reported                                                                                                                                                                                                                                                                                                                                                                                   | 4                  |
| Objectives                | 3      | State specific objectives, including any pre-specified hypotheses                                                                                                                                                                                                                                                                                                                                                                                                      | 5                  |
| <b>Methods</b>            |        |                                                                                                                                                                                                                                                                                                                                                                                                                                                                        |                    |
| Study design              | 4      | Present key elements of study design early in the paper                                                                                                                                                                                                                                                                                                                                                                                                                | 5                  |
| Setting                   | 5      | Describe the setting, locations, and relevant dates, including periods of recruitment, exposure, follow-up, and data collection                                                                                                                                                                                                                                                                                                                                        | 5                  |
| Participants              | 6      | (a) <i>Cohort study</i> —Give the eligibility criteria, and the sources and methods of selection of participants. Describe methods of follow-up<br><i>Case-control study</i> —Give the eligibility criteria, and the sources and methods of case ascertainment and control selection. Give the rationale for the choice of cases and controls<br><i>Cross-sectional study</i> —Give the eligibility criteria, and the sources and methods of selection of participants | 5                  |
|                           |        | (b) <i>Cohort study</i> —For matched studies, give matching criteria and number of exposed and unexposed<br><i>Case-control study</i> —For matched studies, give matching criteria and the number of controls per case                                                                                                                                                                                                                                                 |                    |
| Variables                 | 7      | Clearly define all outcomes, exposures, predictors, potential confounders, and effect modifiers. Give diagnostic criteria, if applicable                                                                                                                                                                                                                                                                                                                               | 6                  |
| Data sources/ measurement | 8*     | For each variable of interest, give sources of data and details of methods of assessment (measurement). Describe comparability of assessment methods if there is more than one group                                                                                                                                                                                                                                                                                   | 5 and 6            |
| Bias                      | 9      | Describe any efforts to address potential sources of bias                                                                                                                                                                                                                                                                                                                                                                                                              | 6 and 7            |
| Study size                | 10     | Explain how the study size was arrived at                                                                                                                                                                                                                                                                                                                                                                                                                              | 7                  |
| Quantitative variables    | 11     | Explain how quantitative variables were handled in the analyses. If applicable, describe which groupings were chosen and why                                                                                                                                                                                                                                                                                                                                           | 6                  |
| Statistical methods       | 12     | (a) Describe all statistical methods, including those used to control for confounding                                                                                                                                                                                                                                                                                                                                                                                  | 6 and 7            |
|                           |        | (b) Describe any methods used to examine subgroups and interactions                                                                                                                                                                                                                                                                                                                                                                                                    | -                  |
|                           |        | (c) Explain how missing data were addressed                                                                                                                                                                                                                                                                                                                                                                                                                            | -                  |
|                           |        | (d) <i>Cohort study</i> —If applicable, explain how loss to follow-up was addressed<br><i>Case-control study</i> —If applicable, explain how matching of cases and controls was addressed                                                                                                                                                                                                                                                                              | -                  |

|                          |     |                                                                                                                                                                                                              |                            |
|--------------------------|-----|--------------------------------------------------------------------------------------------------------------------------------------------------------------------------------------------------------------|----------------------------|
|                          |     | <i>Cross-sectional study</i> —If applicable, describe analytical methods taking account of sampling strategy                                                                                                 |                            |
|                          |     | (e) Describe any sensitivity analyses                                                                                                                                                                        | -                          |
| <b>Results</b>           |     |                                                                                                                                                                                                              |                            |
| Participants             | 13* | (a) Report numbers of individuals at each stage of study—eg numbers potentially eligible, examined for eligibility, confirmed eligible, included in the study, completing follow-up, and analysed            | 7                          |
|                          |     | (b) Give reasons for non-participation at each stage                                                                                                                                                         | -                          |
|                          |     | (c) Consider use of a flow diagram                                                                                                                                                                           | -                          |
| Descriptive data         | 14* | (a) Give characteristics of study participants (eg demographic, clinical, social) and information on exposures and potential confounders                                                                     | 7 and 21 (table 1)         |
|                          |     | (b) Indicate number of participants with missing data for each variable of interest                                                                                                                          | -                          |
|                          |     | (c) <i>Cohort study</i> —Summarise follow-up time (eg, average and total amount)                                                                                                                             | 21 (table 1)               |
| Outcome data             | 15* | <i>Cohort study</i> —Report numbers of outcome events or summary measures over time                                                                                                                          | 7 and 21 (table 1)         |
|                          |     | <i>Case-control study</i> —Report numbers in each exposure category, or summary measures of exposure                                                                                                         |                            |
|                          |     | <i>Cross-sectional study</i> —Report numbers of outcome events or summary measures                                                                                                                           |                            |
| Main results             | 16  | (a) Give unadjusted estimates and, if applicable, confounder-adjusted estimates and their precision (eg, 95% confidence interval). Make clear which confounders were adjusted for and why they were included | 7,8, and 22 (table 2, 3,4) |
|                          |     | (b) Report category boundaries when continuous variables were categorized                                                                                                                                    | -                          |
|                          |     | (c) If relevant, consider translating estimates of relative risk into absolute risk for a meaningful time period                                                                                             | -                          |
| Other analyses           | 17  | Report other analyses done—eg analyses of subgroups and interactions, and sensitivity analyses                                                                                                               | -                          |
| <b>Discussion</b>        |     |                                                                                                                                                                                                              |                            |
| Key results              | 18  | Summarise key results with reference to study objectives                                                                                                                                                     | 8                          |
| Limitations              | 19  | Discuss limitations of the study, taking into account sources of potential bias or imprecision. Discuss both direction and magnitude of any potential bias                                                   | 12 - 13                    |
| Interpretation           | 20  | Give a cautious overall interpretation of results considering objectives, limitations, multiplicity of analyses, results from similar studies, and other relevant evidence                                   | 9-12                       |
| Generalisability         | 21  | Discuss the generalisability (external validity) of the study results                                                                                                                                        | 13                         |
| <b>Other information</b> |     |                                                                                                                                                                                                              |                            |
| Funding                  | 22  | Give the source of funding and the role of the funders for the present study and, if applicable, for the original study on which the present article is based                                                | 14                         |

\*Give information separately for cases and controls in case-control studies and, if applicable, for exposed and unexposed groups in cohort and cross-sectional studies.



1  
2  
3  
4 **Note:** An Explanation and Elaboration article discusses each checklist item and gives methodological background and published examples of transparent reporting. The STROBE  
5 checklist is best used in conjunction with this article (freely available on the Web sites of PLoS Medicine at <http://www.plosmedicine.org/>, Annals of Internal Medicine at  
6 <http://www.annals.org/>, and Epidemiology at <http://www.epidem.com/>). Information on the STROBE Initiative is available at [www.strobe-statement.org](http://www.strobe-statement.org).  
7  
8  
9  
10  
11  
12  
13  
14  
15  
16  
17  
18  
19  
20  
21  
22  
23  
24  
25  
26  
27  
28  
29  
30  
31  
32  
33  
34  
35  
36  
37  
38  
39  
40  
41  
42  
43  
44  
45  
46  
47

For peer review only
